# Supplementary material for: Ice nucleation proteins self-assemble into large fibres to trigger freezing at near 0 °C
Source: eLife. 2023 Dec 18;12:RP91976. doi: 10.7554/eLife.91976 (PMC10727499; doi:10.7554/eLife.91976)
Supplement: Source data 1. [file elife-91976-data1.xlsx]

## Sheet: WISDOM
	arcticexpress	arcticeexpress_sd	midpoint_relocation	midpoint_relocation_sd	pbinp	pbinp_sd	ntrunc1	ntrunc1_sd	ntrunc2	ntrunc2_sd	ntrunc3	ntrunc3_sd	yext	yext_sd	kcoils	kcoils_sd	2coil	2coil_sd	4coil	4coil_sd	6coil	6coil_sd	8coil	8coil_sd	11coil	11coil_sd	rmid	rmid_sd	rdel	rdel_sd	rkh	rkh_sd	yext_only	yext_only_sd	captriple	captriple_sd	nterm_relocation	nterm_relocation_sd
Temp	mean T	std	mean T	std	mean T	std	mean T	std	mean T	std	mean T	std	mean T	std	mean T	std	mean T	std	mean T	std	mean T	std	mean T	std	mean T	std	mean T	std	mean T	std	mean T	std	mean T	std	mean T	std	mean T	std
-6.45	NaN	NaN	NaN	NaN	NaN	NaN	NaN	NaN	NaN	NaN	NaN	NaN	NaN	NaN	NaN	NaN	NaN	NaN	NaN	NaN	NaN	NaN	NaN	NaN	NaN	NaN	NaN	NaN	NaN	NaN	NaN	NaN	NaN	NaN	NaN	NaN	NaN	NaN
-6.55	NaN	NaN	NaN	NaN	NaN	NaN	NaN	NaN	NaN	NaN	NaN	NaN	NaN	NaN	NaN	NaN	NaN	NaN	NaN	NaN	NaN	NaN	NaN	NaN	NaN	NaN	NaN	NaN	NaN	NaN	NaN	NaN	NaN	NaN	NaN	NaN	NaN	NaN
-6.65	NaN	NaN	NaN	NaN	NaN	NaN	NaN	NaN	0.00163399	0.00400243	NaN	NaN	NaN	NaN	NaN	NaN	NaN	NaN	NaN	NaN	NaN	NaN	NaN	NaN	NaN	NaN	NaN	NaN	NaN	NaN	NaN	NaN	NaN	NaN	NaN	NaN	NaN	NaN
-6.75	NaN	NaN	NaN	NaN	NaN	NaN	NaN	NaN	0.00163399	0.00400243	NaN	NaN	NaN	NaN	NaN	NaN	NaN	NaN	NaN	NaN	NaN	NaN	NaN	NaN	NaN	NaN	NaN	NaN	NaN	NaN	NaN	NaN	NaN	NaN	NaN	NaN	NaN	NaN
-6.85	NaN	NaN	NaN	NaN	NaN	NaN	NaN	NaN	0.00163399	0.00400243	NaN	NaN	NaN	NaN	NaN	NaN	NaN	NaN	NaN	NaN	NaN	NaN	NaN	NaN	NaN	NaN	NaN	NaN	NaN	NaN	NaN	NaN	NaN	NaN	NaN	NaN	NaN	NaN
-6.95	NaN	NaN	NaN	NaN	NaN	NaN	NaN	NaN	0.00821293	0.0158087	NaN	NaN	NaN	NaN	NaN	NaN	NaN	NaN	NaN	NaN	NaN	NaN	NaN	NaN	NaN	NaN	NaN	NaN	NaN	NaN	NaN	NaN	NaN	NaN	NaN	NaN	NaN	NaN
-7.05	NaN	NaN	NaN	NaN	NaN	NaN	0.00396825	0.00687322	0.0147919	0.0316733	NaN	NaN	NaN	NaN	NaN	NaN	NaN	NaN	NaN	NaN	NaN	NaN	NaN	NaN	NaN	NaN	NaN	NaN	NaN	NaN	NaN	NaN	NaN	NaN	NaN	NaN	NaN	NaN
-7.15	NaN	NaN	NaN	NaN	NaN	NaN	0.00396825	0.00687322	0.0147919	0.0316733	NaN	NaN	NaN	NaN	0.00338983	0.00757989	NaN	NaN	NaN	NaN	NaN	NaN	NaN	NaN	NaN	NaN	NaN	NaN	NaN	NaN	NaN	NaN	NaN	NaN	NaN	NaN	NaN	NaN
-7.25	NaN	NaN	NaN	NaN	NaN	NaN	0.00396825	0.00687322	0.0186189	0.0368453	NaN	NaN	NaN	NaN	0.00338983	0.00757989	NaN	NaN	NaN	NaN	NaN	NaN	NaN	NaN	NaN	NaN	NaN	NaN	NaN	NaN	NaN	NaN	NaN	NaN	NaN	NaN	NaN	NaN
-7.35	NaN	NaN	NaN	NaN	0.00438596	0.00877193	0.00396825	0.00687322	0.025134	0.0410249	0.00374532	0.00648708	NaN	NaN	0.00547316	0.00784224	NaN	NaN	NaN	NaN	NaN	NaN	NaN	NaN	NaN	NaN	NaN	NaN	NaN	NaN	NaN	NaN	NaN	NaN	NaN	NaN	NaN	NaN
-7.45	NaN	NaN	NaN	NaN	0.00438596	0.00877193	0.0109668	0.0120151	0.0360886	0.0516121	0.00374532	0.00648708	NaN	NaN	0.00764708	0.0074421	NaN	NaN	NaN	NaN	NaN	NaN	NaN	NaN	NaN	NaN	NaN	NaN	NaN	NaN	NaN	NaN	NaN	NaN	NaN	NaN	NaN	NaN
-7.55	NaN	NaN	NaN	NaN	0.00910295	0.00717244	0.0259019	0.0305036	0.0437425	0.0631853	0.011236	0.0194612	NaN	NaN	0.00764708	0.0074421	NaN	NaN	NaN	NaN	NaN	NaN	NaN	NaN	NaN	NaN	NaN	NaN	NaN	NaN	NaN	NaN	NaN	NaN	NaN	NaN	NaN	NaN
-7.65	NaN	NaN	NaN	NaN	0.0138199	0.0092344	0.0289322	0.0297966	0.0609443	0.0852832	0.011236	0.0194612	NaN	NaN	0.0174681	0.016739	NaN	NaN	NaN	NaN	NaN	NaN	NaN	NaN	NaN	NaN	NaN	NaN	NaN	NaN	NaN	NaN	NaN	NaN	NaN	NaN	NaN	NaN
-7.75	NaN	NaN	NaN	NaN	0.025864	0.00992898	0.0437739	0.0247945	0.086627	0.116719	0.0219628	0.0300277	NaN	NaN	0.0282471	0.0313265	NaN	NaN	NaN	NaN	NaN	NaN	NaN	NaN	NaN	NaN	NaN	NaN	NaN	NaN	NaN	NaN	NaN	NaN	NaN	NaN	NaN	NaN
-7.85	NaN	NaN	NaN	NaN	0.034967	0.0169874	0.0617392	0.0422684	0.122977	0.151422	0.035926	0.0397643	NaN	NaN	0.0444086	0.0459506	NaN	NaN	NaN	NaN	NaN	NaN	NaN	NaN	NaN	NaN	NaN	NaN	NaN	NaN	NaN	NaN	NaN	NaN	NaN	NaN	NaN	NaN
-7.95	NaN	NaN	NaN	NaN	0.0426252	0.0129882	0.0857185	0.0480399	0.150263	0.172926	0.0503982	0.0570653	NaN	NaN	0.0542296	0.055277	NaN	NaN	NaN	NaN	NaN	NaN	NaN	NaN	NaN	NaN	NaN	NaN	NaN	NaN	NaN	NaN	NaN	NaN	NaN	NaN	NaN	NaN
-8.05	NaN	NaN	NaN	NaN	0.0564451	0.0220303	0.103637	0.0540583	0.202399	0.204209	0.0780784	0.0888334	NaN	NaN	0.0861382	0.0866398	NaN	NaN	NaN	NaN	NaN	NaN	NaN	NaN	NaN	NaN	NaN	NaN	NaN	NaN	NaN	NaN	NaN	NaN	NaN	NaN	NaN	NaN
-8.15	NaN	NaN	NaN	NaN	0.0790369	0.0410925	0.140319	0.0483009	0.261876	0.252235	0.111213	0.101002	NaN	NaN	0.113916	0.122951	0	0	NaN	NaN	NaN	NaN	NaN	NaN	NaN	NaN	NaN	NaN	NaN	NaN	NaN	NaN	NaN	NaN	NaN	NaN	NaN	NaN
-8.25	NaN	NaN	NaN	NaN	0.112228	0.052423	0.171081	0.0811065	0.319272	0.294955	0.161547	0.123402	NaN	NaN	0.154339	0.164536	0.00316456	0.00632911	NaN	NaN	NaN	NaN	NaN	NaN	NaN	NaN	NaN	NaN	NaN	NaN	NaN	NaN	NaN	NaN	NaN	NaN	NaN	NaN
-8.35	NaN	NaN	NaN	NaN	0.160684	0.0834199	0.232052	0.0849702	0.390773	0.332693	0.221344	0.152699	NaN	NaN	0.242055	0.229933	0.00316456	0.00632911	NaN	NaN	NaN	NaN	NaN	NaN	NaN	NaN	NaN	NaN	NaN	NaN	NaN	NaN	NaN	NaN	NaN	NaN	NaN	NaN
-8.45	NaN	NaN	NaN	NaN	0.188655	0.0931712	0.316522	0.12041	0.450443	0.342261	0.269904	0.164551	NaN	NaN	0.324813	0.280853	0.00316456	0.00632911	NaN	NaN	NaN	NaN	NaN	NaN	NaN	NaN	NaN	NaN	NaN	NaN	NaN	NaN	NaN	NaN	NaN	NaN	NaN	NaN
-8.55	NaN	NaN	NaN	NaN	0.288559	0.120052	0.411943	0.0913364	0.518973	0.35545	0.398276	0.14348	NaN	NaN	0.403055	0.340411	0.00858137	0.0119377	NaN	NaN	NaN	NaN	NaN	NaN	NaN	NaN	NaN	NaN	NaN	NaN	NaN	NaN	NaN	NaN	NaN	NaN	NaN	NaN
-8.65	NaN	NaN	NaN	NaN	0.350384	0.134624	0.513254	0.0918775	0.588152	0.354182	0.489171	0.165443	NaN	NaN	0.488855	0.395743	0.0250844	0.0280245	NaN	NaN	NaN	NaN	NaN	NaN	NaN	NaN	NaN	NaN	NaN	NaN	NaN	NaN	NaN	NaN	NaN	NaN	NaN	NaN
-8.75	NaN	NaN	NaN	NaN	0.430969	0.132177	0.616611	0.0746622	0.64865	0.343674	0.569093	0.179932	NaN	NaN	0.578765	0.373515	0.0660091	0.044751	NaN	NaN	NaN	NaN	NaN	NaN	NaN	NaN	NaN	NaN	NaN	NaN	NaN	NaN	NaN	NaN	NaN	NaN	NaN	NaN
-8.85	NaN	NaN	NaN	NaN	0.56845	0.171261	0.797967	0.0900566	0.750051	0.299665	0.722862	0.162615	NaN	NaN	0.676233	0.306823	0.133933	0.0619024	NaN	NaN	NaN	NaN	NaN	NaN	NaN	NaN	NaN	NaN	NaN	NaN	NaN	NaN	NaN	NaN	NaN	NaN	NaN	NaN
-8.95	NaN	NaN	NaN	NaN	0.722852	0.212923	0.951647	0.0504107	0.812022	0.259523	0.89022	0.102555	NaN	NaN	0.784878	0.231952	0.251396	0.0963663	NaN	NaN	NaN	NaN	NaN	NaN	NaN	NaN	NaN	NaN	NaN	NaN	NaN	NaN	NaN	NaN	NaN	NaN	NaN	NaN
-9.05	0.00350877	0.00607737	NaN	NaN	0.867923	0.202368	1	0	0.914947	0.157029	1	0	NaN	NaN	0.90385	0.16169	0.431869	0.15172	NaN	NaN	NaN	NaN	NaN	NaN	NaN	NaN	NaN	NaN	NaN	NaN	NaN	NaN	NaN	NaN	NaN	NaN	NaN	NaN
-9.15	0.00350877	0.00607737	NaN	NaN	0.938235	0.123529	NaN	NaN	0.988066	0.024098	NaN	NaN	NaN	NaN	0.954348	0.102081	0.662321	0.233572	NaN	NaN	NaN	NaN	NaN	NaN	NaN	NaN	NaN	NaN	NaN	NaN	NaN	NaN	NaN	NaN	NaN	NaN	NaN	NaN
-9.25	0.00350877	0.00607737	NaN	NaN	0.989732	0.012106	NaN	NaN	1	0	NaN	NaN	NaN	NaN	0.986957	0.0291661	0.852559	0.174605	NaN	NaN	NaN	NaN	NaN	NaN	NaN	NaN	NaN	NaN	NaN	NaN	NaN	NaN	0.029085	0.0254189	NaN	NaN	NaN	NaN
-9.35	0.00350877	0.00607737	NaN	NaN	0.995614	0.00877193	NaN	NaN	NaN	NaN	NaN	NaN	0.00406504	0.00704086	1	0	0.971998	0.0382717	NaN	NaN	NaN	NaN	NaN	NaN	NaN	NaN	NaN	NaN	NaN	NaN	NaN	NaN	0.0584967	0.0670134	NaN	NaN	NaN	NaN
-9.45	0.00701754	0.0121547	NaN	NaN	1	0	NaN	NaN	NaN	NaN	NaN	NaN	0.00406504	0.00704086	NaN	NaN	1	0	NaN	NaN	NaN	NaN	NaN	NaN	NaN	NaN	NaN	NaN	NaN	NaN	NaN	NaN	0.0813725	0.0679377	NaN	NaN	NaN	NaN
-9.55	0.00701754	0.0121547	NaN	NaN	NaN	NaN	NaN	NaN	NaN	NaN	NaN	NaN	0.00406504	0.00704086	NaN	NaN	NaN	NaN	0.0107458	0.00272196	NaN	NaN	NaN	NaN	NaN	NaN	NaN	NaN	NaN	NaN	NaN	NaN	0.138235	0.0540729	NaN	NaN	NaN	NaN
-9.65	0.0105263	0.0182321	NaN	NaN	NaN	NaN	NaN	NaN	NaN	NaN	NaN	NaN	0.0121951	0.0211226	NaN	NaN	NaN	NaN	0.0229783	0.00787162	NaN	NaN	NaN	NaN	NaN	NaN	NaN	NaN	NaN	NaN	NaN	NaN	0.183987	0.0559215	NaN	NaN	NaN	NaN
-9.75	0.0105263	0.0182321	NaN	NaN	NaN	NaN	NaN	NaN	NaN	NaN	NaN	NaN	0.0195281	0.0258032	NaN	NaN	NaN	NaN	0.0826538	0.047524	NaN	NaN	NaN	NaN	NaN	NaN	NaN	NaN	NaN	NaN	NaN	NaN	0.269608	0.0512999	NaN	NaN	NaN	NaN
-9.85	0.0105263	0.0182321	NaN	NaN	NaN	NaN	NaN	NaN	NaN	NaN	NaN	NaN	0.0195281	0.0258032	NaN	NaN	NaN	NaN	0.148445	0.0924732	NaN	NaN	NaN	NaN	NaN	NaN	NaN	NaN	NaN	NaN	NaN	NaN	0.327778	0.102138	NaN	NaN	NaN	NaN
-9.95	0.0105263	0.0182321	NaN	NaN	NaN	NaN	NaN	NaN	NaN	NaN	NaN	NaN	0.0195281	0.0258032	NaN	NaN	NaN	NaN	0.234072	0.166628	NaN	NaN	NaN	NaN	NaN	NaN	NaN	NaN	NaN	NaN	NaN	NaN	0.424183	0.0656269	NaN	NaN	NaN	NaN
-10.05	0.0140351	0.0243095	NaN	NaN	NaN	NaN	NaN	NaN	NaN	NaN	NaN	NaN	0.0195281	0.0258032	NaN	NaN	NaN	NaN	0.298378	0.198262	NaN	NaN	NaN	NaN	NaN	NaN	NaN	NaN	NaN	NaN	NaN	NaN	0.469935	0.0674755	NaN	NaN	NaN	NaN
-10.15	0.0140351	0.0243095	NaN	NaN	NaN	NaN	NaN	NaN	NaN	NaN	NaN	NaN	0.0195281	0.0258032	NaN	NaN	NaN	NaN	0.448479	0.256085	NaN	NaN	NaN	NaN	NaN	NaN	NaN	NaN	NaN	NaN	NaN	NaN	0.520915	0.0452918	NaN	NaN	NaN	NaN
-10.25	0.0140351	0.0243095	NaN	NaN	NaN	NaN	NaN	NaN	NaN	NaN	NaN	NaN	0.0195281	0.0258032	NaN	NaN	NaN	NaN	0.639908	0.33767	NaN	NaN	NaN	NaN	NaN	NaN	NaN	NaN	NaN	NaN	NaN	NaN	0.577778	0.031427	NaN	NaN	0.0112155	0.000974709
-10.35	0.0140351	0.0243095	NaN	NaN	NaN	NaN	NaN	NaN	NaN	NaN	NaN	NaN	0.0235932	0.0327432	NaN	NaN	NaN	NaN	0.791667	0.360844	NaN	NaN	NaN	NaN	NaN	NaN	NaN	NaN	NaN	NaN	NaN	NaN	0.623529	0.0332756	NaN	NaN	0.0224311	0.00194942
-10.45	0.0140351	0.0243095	NaN	NaN	NaN	NaN	NaN	NaN	NaN	NaN	NaN	NaN	0.0276582	0.0397186	NaN	NaN	NaN	NaN	0.856481	0.248581	NaN	NaN	NaN	NaN	NaN	NaN	NaN	NaN	NaN	NaN	NaN	NaN	0.680392	0.0194108	NaN	NaN	0.0224311	0.00194942
-10.55	0.0140351	0.0243095	NaN	NaN	NaN	NaN	NaN	NaN	NaN	NaN	NaN	NaN	0.0317233	0.0467138	NaN	NaN	NaN	NaN	0.944444	0.096225	NaN	NaN	NaN	NaN	NaN	NaN	NaN	NaN	NaN	NaN	NaN	NaN	0.715033	0.0369729	NaN	NaN	0.0224311	0.00194942
-10.65	0.0140351	0.0243095	NaN	NaN	NaN	NaN	NaN	NaN	NaN	NaN	NaN	NaN	0.0357393	0.0429925	NaN	NaN	NaN	NaN	0.99537	0.00801875	NaN	NaN	NaN	NaN	NaN	NaN	NaN	NaN	NaN	NaN	NaN	NaN	0.754902	0.0305026	NaN	NaN	0.0276942	0.00549381
-10.75	0.0140351	0.0243095	NaN	NaN	NaN	NaN	NaN	NaN	NaN	NaN	NaN	NaN	0.0390073	0.0403252	NaN	NaN	NaN	NaN	1	0	NaN	NaN	NaN	NaN	NaN	NaN	NaN	NaN	NaN	NaN	NaN	NaN	0.777778	0.031427	NaN	NaN	0.0329574	0.012937
-10.85	0.0140351	0.0243095	NaN	NaN	NaN	NaN	NaN	NaN	NaN	NaN	NaN	NaN	0.0390073	0.0403252	NaN	NaN	NaN	NaN	NaN	NaN	NaN	NaN	NaN	NaN	NaN	NaN	NaN	NaN	NaN	NaN	NaN	NaN	0.800654	0.0323513	NaN	NaN	0.0382206	0.0203803
-10.95	0.0140351	0.0243095	NaN	NaN	NaN	NaN	NaN	NaN	NaN	NaN	NaN	NaN	0.0422753	0.0383141	NaN	NaN	NaN	NaN	NaN	NaN	NaN	NaN	NaN	NaN	NaN	NaN	NaN	NaN	NaN	NaN	NaN	NaN	0.817647	0.0249567	NaN	NaN	0.0382206	0.0203803
-11.05	0.0140351	0.0243095	NaN	NaN	NaN	NaN	NaN	NaN	NaN	NaN	NaN	NaN	0.0422753	0.0383141	NaN	NaN	NaN	NaN	NaN	NaN	NaN	NaN	NaN	NaN	NaN	NaN	NaN	NaN	NaN	NaN	NaN	NaN	0.823529	0.0332756	NaN	NaN	0.0382206	0.0203803
-11.15	0.0175439	0.0303869	NaN	NaN	NaN	NaN	NaN	NaN	NaN	NaN	NaN	NaN	0.0463403	0.0452	NaN	NaN	NaN	NaN	NaN	NaN	NaN	NaN	NaN	NaN	NaN	NaN	NaN	NaN	NaN	NaN	NaN	NaN	0.840523	0.025881	NaN	NaN	0.0382206	0.0203803
-11.25	0.0175439	0.0303869	NaN	NaN	NaN	NaN	NaN	NaN	NaN	NaN	NaN	NaN	0.0536733	0.0504329	NaN	NaN	NaN	NaN	NaN	NaN	NaN	NaN	NaN	NaN	NaN	NaN	NaN	NaN	NaN	NaN	NaN	NaN	0.874837	0.0272675	NaN	NaN	0.0441729	0.0119623
-11.35	0.0175439	0.0303869	NaN	NaN	NaN	NaN	NaN	NaN	NaN	NaN	NaN	NaN	0.0577384	0.057245	NaN	NaN	NaN	NaN	NaN	NaN	NaN	NaN	NaN	NaN	NaN	NaN	NaN	NaN	NaN	NaN	NaN	NaN	0.892157	0.0360486	NaN	NaN	0.0441729	0.0119623
-11.45	0.0175439	0.0303869	NaN	NaN	NaN	NaN	NaN	NaN	NaN	NaN	NaN	NaN	0.0577384	0.057245	NaN	NaN	NaN	NaN	NaN	NaN	NaN	NaN	NaN	NaN	NaN	NaN	NaN	NaN	NaN	NaN	NaN	NaN	0.909477	0.0448296	NaN	NaN	0.0441729	0.0119623
-11.55	0.0175439	0.0303869	0.00245098	0.00490196	NaN	NaN	NaN	NaN	NaN	NaN	NaN	NaN	0.0618034	0.0641065	NaN	NaN	NaN	NaN	NaN	NaN	NaN	NaN	NaN	NaN	NaN	NaN	NaN	NaN	NaN	NaN	NaN	NaN	0.920915	0.0452918	NaN	NaN	0.0441729	0.0119623
-11.65	0.0175439	0.0303869	0.00245098	0.00490196	NaN	NaN	NaN	NaN	NaN	NaN	NaN	NaN	0.0658684	0.0710032	NaN	NaN	NaN	NaN	NaN	NaN	NaN	NaN	NaN	NaN	NaN	NaN	NaN	NaN	NaN	NaN	NaN	NaN	0.932353	0.045754	NaN	NaN	0.0553885	0.0109876
-11.75	0.0175439	0.0303869	0.00245098	0.00490196	NaN	NaN	NaN	NaN	NaN	NaN	NaN	NaN	0.0699335	0.0779256	NaN	NaN	NaN	NaN	NaN	NaN	NaN	NaN	NaN	NaN	NaN	NaN	NaN	NaN	NaN	NaN	NaN	NaN	0.932353	0.045754	NaN	NaN	0.0553885	0.0109876
-11.85	0.0175439	0.0303869	0.00245098	0.00490196	NaN	NaN	NaN	NaN	NaN	NaN	NaN	NaN	0.0739496	0.0736436	NaN	NaN	NaN	NaN	NaN	NaN	NaN	NaN	NaN	NaN	NaN	NaN	NaN	NaN	NaN	NaN	NaN	NaN	0.937908	0.0378972	NaN	NaN	0.0553885	0.0109876
-11.95	0.0175439	0.0303869	0.00245098	0.00490196	NaN	NaN	NaN	NaN	NaN	NaN	NaN	NaN	0.0804855	0.0697888	NaN	NaN	NaN	NaN	NaN	NaN	NaN	NaN	NaN	NaN	NaN	NaN	NaN	NaN	NaN	NaN	NaN	NaN	0.943464	0.0300405	NaN	NaN	0.0553885	0.0109876
-12.05	0.0175439	0.0303869	0.00245098	0.00490196	NaN	NaN	NaN	NaN	NaN	NaN	NaN	NaN	0.0804855	0.0697888	NaN	NaN	NaN	NaN	NaN	NaN	NaN	NaN	NaN	NaN	NaN	NaN	NaN	NaN	NaN	NaN	NaN	NaN	0.949346	0.0383594	NaN	NaN	0.0553885	0.0109876
-12.15	0.0175439	0.0303869	0.00245098	0.00490196	NaN	NaN	NaN	NaN	NaN	NaN	NaN	NaN	0.0845016	0.0651112	NaN	NaN	NaN	NaN	NaN	NaN	NaN	NaN	NaN	NaN	NaN	NaN	NaN	NaN	NaN	NaN	NaN	NaN	0.954902	0.0305026	NaN	NaN	0.0553885	0.0109876
-12.25	0.0175439	0.0303869	0.00245098	0.00490196	NaN	NaN	NaN	NaN	NaN	NaN	NaN	NaN	0.0918346	0.0702307	NaN	NaN	NaN	NaN	NaN	NaN	NaN	NaN	NaN	NaN	NaN	NaN	NaN	NaN	NaN	NaN	NaN	NaN	NaN	NaN	NaN	NaN	0.0553885	0.0109876
-12.35	0.0175439	0.0303869	0.00245098	0.00490196	NaN	NaN	NaN	NaN	NaN	NaN	NaN	NaN	0.0918346	0.0702307	NaN	NaN	NaN	NaN	NaN	NaN	NaN	NaN	NaN	NaN	NaN	NaN	NaN	NaN	NaN	NaN	NaN	NaN	NaN	NaN	NaN	NaN	0.0553885	0.0109876
-12.45	0.0175439	0.0303869	0.00245098	0.00490196	NaN	NaN	NaN	NaN	NaN	NaN	NaN	NaN	0.0958996	0.0770979	NaN	NaN	NaN	NaN	NaN	NaN	NaN	NaN	NaN	NaN	NaN	NaN	NaN	NaN	NaN	NaN	NaN	NaN	NaN	NaN	NaN	NaN	0.0553885	0.0109876
-12.55	0.0175439	0.0303869	0.00245098	0.00490196	NaN	NaN	NaN	NaN	NaN	NaN	NaN	NaN	0.0999647	0.0839938	NaN	NaN	NaN	NaN	NaN	NaN	NaN	NaN	NaN	NaN	NaN	NaN	NaN	NaN	NaN	NaN	NaN	NaN	NaN	NaN	NaN	NaN	0.0553885	0.0109876
-12.65	0.0175439	0.0303869	0.00245098	0.00490196	NaN	NaN	NaN	NaN	NaN	NaN	NaN	NaN	0.0999647	0.0839938	NaN	NaN	NaN	NaN	NaN	NaN	NaN	NaN	NaN	NaN	NaN	NaN	NaN	NaN	NaN	NaN	NaN	NaN	NaN	NaN	NaN	NaN	0.0553885	0.0109876
-12.75	0.0175439	0.0303869	0.00245098	0.00490196	NaN	NaN	NaN	NaN	NaN	NaN	NaN	NaN	0.0999647	0.0839938	NaN	NaN	NaN	NaN	NaN	NaN	NaN	NaN	NaN	NaN	NaN	NaN	NaN	NaN	NaN	NaN	NaN	NaN	NaN	NaN	NaN	NaN	0.0606516	0.0184309
-12.85	0.0175439	0.0303869	0.00245098	0.00490196	NaN	NaN	NaN	NaN	NaN	NaN	NaN	NaN	0.108095	0.0978477	NaN	NaN	NaN	NaN	NaN	NaN	NaN	NaN	NaN	NaN	NaN	NaN	NaN	NaN	NaN	NaN	NaN	NaN	NaN	NaN	NaN	NaN	0.0606516	0.0184309
-12.95	0.0175439	0.0303869	0.00245098	0.00490196	NaN	NaN	NaN	NaN	NaN	NaN	NaN	NaN	0.11216	0.104797	NaN	NaN	NaN	NaN	NaN	NaN	NaN	NaN	NaN	NaN	NaN	NaN	NaN	NaN	NaN	NaN	NaN	NaN	NaN	NaN	NaN	NaN	0.0659148	0.0258741
-13.05	0.0175439	0.0303869	0.00245098	0.00490196	NaN	NaN	NaN	NaN	NaN	NaN	NaN	NaN	0.11216	0.104797	NaN	NaN	NaN	NaN	NaN	NaN	NaN	NaN	NaN	NaN	NaN	NaN	NaN	NaN	NaN	NaN	NaN	NaN	NaN	NaN	NaN	NaN	0.0711779	0.0333173
-13.15	0.0175439	0.0303869	0.00245098	0.00490196	NaN	NaN	NaN	NaN	NaN	NaN	NaN	NaN	0.119493	0.109797	NaN	NaN	NaN	NaN	NaN	NaN	NaN	NaN	NaN	NaN	NaN	NaN	NaN	NaN	NaN	NaN	NaN	NaN	NaN	NaN	NaN	NaN	0.0711779	0.0333173
-13.25	0.0175439	0.0303869	0.00245098	0.00490196	NaN	NaN	NaN	NaN	NaN	NaN	NaN	NaN	0.119493	0.109797	NaN	NaN	NaN	NaN	NaN	NaN	NaN	NaN	NaN	NaN	NaN	NaN	NaN	NaN	NaN	NaN	NaN	NaN	NaN	NaN	NaN	NaN	0.0711779	0.0333173
-13.35	0.0175439	0.0303869	0.00245098	0.00490196	NaN	NaN	NaN	NaN	NaN	NaN	NaN	NaN	0.123509	0.105354	NaN	NaN	NaN	NaN	NaN	NaN	NaN	NaN	NaN	NaN	NaN	NaN	NaN	NaN	NaN	NaN	NaN	NaN	NaN	NaN	NaN	NaN	0.0711779	0.0333173
-13.45	0.0175439	0.0303869	0.00245098	0.00490196	NaN	NaN	NaN	NaN	NaN	NaN	NaN	NaN	0.123509	0.105354	NaN	NaN	NaN	NaN	NaN	NaN	NaN	NaN	NaN	NaN	NaN	NaN	NaN	NaN	NaN	NaN	NaN	NaN	NaN	NaN	NaN	NaN	0.0711779	0.0333173
-13.55	0.0175439	0.0303869	0.00490196	0.00980392	NaN	NaN	NaN	NaN	NaN	NaN	NaN	NaN	0.123509	0.105354	NaN	NaN	NaN	NaN	NaN	NaN	NaN	NaN	NaN	NaN	NaN	NaN	NaN	NaN	NaN	NaN	NaN	NaN	NaN	NaN	NaN	NaN	0.0711779	0.0333173
-13.65	0.0175439	0.0303869	0.00490196	0.00980392	NaN	NaN	NaN	NaN	NaN	NaN	NaN	NaN	0.130842	0.110307	NaN	NaN	NaN	NaN	NaN	NaN	NaN	NaN	NaN	NaN	NaN	NaN	NaN	NaN	NaN	NaN	NaN	NaN	NaN	NaN	NaN	NaN	0.0711779	0.0333173
-13.75	0.0175439	0.0303869	0.00490196	0.00980392	NaN	NaN	NaN	NaN	NaN	NaN	NaN	NaN	0.130842	0.110307	NaN	NaN	NaN	NaN	NaN	NaN	NaN	NaN	NaN	NaN	NaN	NaN	NaN	NaN	NaN	NaN	NaN	NaN	NaN	NaN	NaN	NaN	0.0711779	0.0333173
-13.85	0.0175439	0.0303869	0.00490196	0.00980392	NaN	NaN	NaN	NaN	NaN	NaN	NaN	NaN	0.130842	0.110307	NaN	NaN	NaN	NaN	NaN	NaN	NaN	NaN	NaN	NaN	NaN	NaN	NaN	NaN	NaN	NaN	NaN	NaN	NaN	NaN	NaN	NaN	0.0711779	0.0333173
-13.95	0.0175439	0.0303869	0.00490196	0.00980392	NaN	NaN	NaN	NaN	NaN	NaN	NaN	NaN	0.134858	0.105925	NaN	NaN	NaN	NaN	NaN	NaN	NaN	NaN	NaN	NaN	NaN	NaN	NaN	NaN	NaN	NaN	NaN	NaN	NaN	NaN	NaN	NaN	0.0711779	0.0333173
-14.05	0.0175439	0.0303869	0.00490196	0.00980392	NaN	NaN	NaN	NaN	NaN	NaN	NaN	NaN	0.138874	0.101831	NaN	NaN	NaN	NaN	NaN	NaN	NaN	NaN	NaN	NaN	NaN	NaN	NaN	NaN	NaN	NaN	NaN	NaN	NaN	NaN	NaN	NaN	0.0711779	0.0333173
-14.15	0.0175439	0.0303869	0.00490196	0.00980392	NaN	NaN	NaN	NaN	NaN	NaN	NaN	NaN	0.142142	0.0995247	NaN	NaN	NaN	NaN	NaN	NaN	NaN	NaN	NaN	NaN	NaN	NaN	NaN	NaN	NaN	NaN	NaN	NaN	NaN	NaN	NaN	NaN	0.0711779	0.0333173
-14.25	0.0175439	0.0303869	0.0071341	0.00932032	NaN	NaN	NaN	NaN	NaN	NaN	NaN	NaN	0.146158	0.0954566	NaN	NaN	NaN	NaN	NaN	NaN	NaN	NaN	NaN	NaN	NaN	NaN	NaN	NaN	NaN	NaN	NaN	NaN	NaN	NaN	NaN	NaN	0.0711779	0.0333173
-14.35	0.0175439	0.0303869	0.0071341	0.00932032	NaN	NaN	NaN	NaN	NaN	NaN	NaN	NaN	0.160726	0.0827225	NaN	NaN	NaN	NaN	NaN	NaN	NaN	NaN	NaN	NaN	NaN	NaN	NaN	NaN	NaN	NaN	NaN	NaN	NaN	NaN	NaN	NaN	0.0711779	0.0333173
-14.45	0.0175439	0.0303869	0.0071341	0.00932032	NaN	NaN	NaN	NaN	NaN	NaN	NaN	NaN	0.172075	0.0833996	NaN	NaN	NaN	NaN	NaN	NaN	NaN	NaN	NaN	NaN	NaN	NaN	NaN	NaN	NaN	NaN	NaN	NaN	NaN	NaN	NaN	NaN	0.0711779	0.0333173
-14.55	0.0175439	0.0303869	0.0071341	0.00932032	NaN	NaN	NaN	NaN	NaN	NaN	NaN	NaN	0.176091	0.0798891	NaN	NaN	NaN	NaN	NaN	NaN	NaN	NaN	NaN	NaN	NaN	NaN	NaN	NaN	NaN	NaN	NaN	NaN	NaN	NaN	NaN	NaN	0.0711779	0.0333173
-14.65	0.0175439	0.0303869	0.0071341	0.00932032	NaN	NaN	NaN	NaN	NaN	NaN	NaN	NaN	0.180107	0.0768494	NaN	NaN	NaN	NaN	NaN	NaN	NaN	NaN	NaN	NaN	NaN	NaN	NaN	NaN	NaN	NaN	NaN	NaN	NaN	NaN	NaN	NaN	0.0711779	0.0333173
-14.75	0.0175439	0.0303869	0.0071341	0.00932032	NaN	NaN	NaN	NaN	NaN	NaN	NaN	NaN	0.183375	0.0736317	NaN	NaN	NaN	NaN	NaN	NaN	NaN	NaN	NaN	NaN	NaN	NaN	NaN	NaN	NaN	NaN	NaN	NaN	NaN	NaN	NaN	NaN	0.0771303	0.0248994
-14.85	0.0175439	0.0303869	0.0071341	0.00932032	NaN	NaN	NaN	NaN	NaN	NaN	NaN	NaN	0.190708	0.0777612	NaN	NaN	NaN	NaN	NaN	NaN	NaN	NaN	NaN	NaN	NaN	NaN	NaN	NaN	NaN	NaN	NaN	NaN	NaN	NaN	NaN	NaN	0.0771303	0.0248994
-14.95	0.0175439	0.0303869	0.0071341	0.00932032	NaN	NaN	NaN	NaN	NaN	NaN	NaN	NaN	0.194724	0.0744272	NaN	NaN	NaN	NaN	NaN	NaN	NaN	NaN	NaN	NaN	NaN	NaN	NaN	NaN	NaN	NaN	NaN	NaN	NaN	NaN	NaN	NaN	0.0771303	0.0248994
-15.05	0.0175439	0.0303869	0.0071341	0.00932032	NaN	NaN	NaN	NaN	NaN	NaN	NaN	NaN	0.213309	0.0596251	NaN	NaN	NaN	NaN	NaN	NaN	NaN	NaN	NaN	NaN	NaN	NaN	NaN	NaN	NaN	NaN	NaN	NaN	NaN	NaN	NaN	NaN	0.0771303	0.0248994
-15.15	0.0175439	0.0303869	0.0071341	0.00932032	NaN	NaN	NaN	NaN	NaN	NaN	NaN	NaN	0.216576	0.0559457	NaN	NaN	NaN	NaN	NaN	NaN	NaN	NaN	NaN	NaN	NaN	NaN	NaN	NaN	NaN	NaN	NaN	NaN	NaN	NaN	NaN	NaN	0.0823935	0.0323426
-15.25	0.0175439	0.0303869	0.0071341	0.00932032	NaN	NaN	NaN	NaN	NaN	NaN	NaN	NaN	0.224707	0.0699073	NaN	NaN	NaN	NaN	NaN	NaN	NaN	NaN	NaN	NaN	NaN	NaN	NaN	NaN	NaN	NaN	NaN	NaN	NaN	NaN	NaN	NaN	0.0823935	0.0323426
-15.35	0.0175439	0.0303869	0.0071341	0.00932032	NaN	NaN	NaN	NaN	NaN	NaN	NaN	NaN	0.227975	0.0666796	NaN	NaN	NaN	NaN	NaN	NaN	NaN	NaN	NaN	NaN	NaN	NaN	NaN	NaN	NaN	NaN	NaN	NaN	NaN	NaN	NaN	NaN	0.0823935	0.0323426
-15.45	0.0175439	0.0303869	0.0071341	0.00932032	NaN	NaN	NaN	NaN	NaN	NaN	NaN	NaN	0.227975	0.0666796	NaN	NaN	NaN	NaN	NaN	NaN	NaN	NaN	NaN	NaN	NaN	NaN	NaN	NaN	NaN	NaN	NaN	NaN	NaN	NaN	NaN	NaN	0.0823935	0.0323426
-15.55	0.0175439	0.0303869	0.00936625	0.0108388	NaN	NaN	NaN	NaN	NaN	NaN	NaN	NaN	0.231243	0.0637917	NaN	NaN	NaN	NaN	NaN	NaN	NaN	NaN	NaN	NaN	NaN	NaN	NaN	NaN	NaN	NaN	NaN	NaN	NaN	NaN	NaN	NaN	0.0823935	0.0323426
-15.65	0.0175439	0.0303869	0.00936625	0.0108388	NaN	NaN	NaN	NaN	NaN	NaN	NaN	NaN	0.23451	0.0612917	NaN	NaN	NaN	NaN	NaN	NaN	NaN	NaN	NaN	NaN	NaN	NaN	NaN	NaN	NaN	NaN	NaN	NaN	NaN	NaN	NaN	NaN	0.0823935	0.0323426
-15.75	0.0175439	0.0303869	0.00936625	0.0108388	NaN	NaN	NaN	NaN	NaN	NaN	NaN	NaN	0.238527	0.0574645	NaN	NaN	NaN	NaN	NaN	NaN	NaN	NaN	NaN	NaN	NaN	NaN	NaN	NaN	NaN	NaN	NaN	NaN	NaN	NaN	NaN	NaN	0.0823935	0.0323426
-15.85	0.0175439	0.0303869	0.00936625	0.0108388	NaN	NaN	NaN	NaN	NaN	NaN	NaN	NaN	0.242543	0.0542628	NaN	NaN	NaN	NaN	NaN	NaN	NaN	NaN	NaN	NaN	NaN	NaN	NaN	NaN	NaN	NaN	NaN	NaN	NaN	NaN	NaN	NaN	0.0823935	0.0323426
-15.95	0.0245614	0.0425416	0.00936625	0.0108388	NaN	NaN	NaN	NaN	NaN	NaN	NaN	NaN	0.242543	0.0542628	NaN	NaN	NaN	NaN	NaN	NaN	NaN	NaN	NaN	NaN	NaN	NaN	NaN	NaN	NaN	NaN	NaN	NaN	NaN	NaN	NaN	NaN	0.0823935	0.0323426
-16.05	0.0245614	0.0425416	0.00936625	0.0108388	NaN	NaN	NaN	NaN	NaN	NaN	NaN	NaN	0.242543	0.0542628	NaN	NaN	NaN	NaN	NaN	NaN	NaN	NaN	NaN	NaN	NaN	NaN	NaN	NaN	NaN	NaN	NaN	NaN	NaN	NaN	NaN	NaN	0.0823935	0.0323426
-16.15	0.0245614	0.0425416	0.00936625	0.0108388	NaN	NaN	NaN	NaN	NaN	NaN	NaN	NaN	0.257859	0.044793	NaN	NaN	NaN	NaN	NaN	NaN	NaN	NaN	NaN	NaN	NaN	NaN	NaN	NaN	NaN	NaN	NaN	NaN	NaN	NaN	NaN	NaN	0.0823935	0.0323426
-16.25	0.0245614	0.0425416	0.00936625	0.0108388	NaN	NaN	NaN	NaN	NaN	NaN	NaN	NaN	0.261127	0.0403112	NaN	NaN	NaN	NaN	NaN	NaN	NaN	NaN	NaN	NaN	NaN	NaN	NaN	NaN	NaN	NaN	NaN	NaN	NaN	NaN	NaN	NaN	0.0823935	0.0323426
-16.35	0.0245614	0.0425416	0.00936625	0.0108388	NaN	NaN	NaN	NaN	NaN	NaN	NaN	NaN	0.269159	0.0402865	NaN	NaN	NaN	NaN	NaN	NaN	NaN	NaN	NaN	NaN	NaN	NaN	NaN	NaN	NaN	NaN	NaN	NaN	NaN	NaN	NaN	NaN	0.0823935	0.0323426
-16.45	0.0245614	0.0425416	0.00936625	0.0108388	NaN	NaN	NaN	NaN	NaN	NaN	NaN	NaN	0.27724	0.04694	NaN	NaN	NaN	NaN	NaN	NaN	NaN	NaN	NaN	NaN	NaN	NaN	NaN	NaN	NaN	NaN	NaN	NaN	NaN	NaN	NaN	NaN	0.0823935	0.0323426
-16.55	0.0245614	0.0425416	0.00936625	0.0108388	NaN	NaN	NaN	NaN	NaN	NaN	NaN	NaN	0.289386	0.058883	NaN	NaN	NaN	NaN	NaN	NaN	NaN	NaN	NaN	NaN	NaN	NaN	NaN	NaN	NaN	NaN	NaN	NaN	NaN	NaN	NaN	NaN	0.0823935	0.0323426
-16.65	0.0245614	0.0425416	0.0115984	0.0137095	NaN	NaN	NaN	NaN	NaN	NaN	NaN	NaN	0.308019	0.0563058	NaN	NaN	NaN	NaN	NaN	NaN	NaN	NaN	NaN	NaN	NaN	NaN	NaN	NaN	NaN	NaN	NaN	NaN	NaN	NaN	NaN	NaN	0.0823935	0.0323426
-16.75	0.0245614	0.0425416	0.0138305	0.0172708	NaN	NaN	NaN	NaN	NaN	NaN	NaN	NaN	0.319368	0.05762	NaN	NaN	NaN	NaN	NaN	NaN	NaN	NaN	NaN	NaN	NaN	NaN	NaN	NaN	NaN	NaN	NaN	NaN	NaN	NaN	NaN	NaN	0.0823935	0.0323426
-16.85	0.0245614	0.0425416	0.0160627	0.0211771	NaN	NaN	NaN	NaN	NaN	NaN	NaN	NaN	0.327449	0.0644405	NaN	NaN	NaN	NaN	NaN	NaN	NaN	NaN	NaN	NaN	NaN	NaN	NaN	NaN	NaN	NaN	NaN	NaN	NaN	NaN	NaN	NaN	0.0823935	0.0323426
-16.95	0.0245614	0.0425416	0.0182178	0.0193581	NaN	NaN	NaN	NaN	NaN	NaN	NaN	NaN	0.331514	0.0694206	NaN	NaN	NaN	NaN	NaN	NaN	NaN	NaN	NaN	NaN	NaN	NaN	NaN	NaN	NaN	NaN	NaN	NaN	NaN	NaN	NaN	NaN	0.0823935	0.0323426
-17.05	0.0245614	0.0425416	0.0182178	0.0193581	NaN	NaN	NaN	NaN	NaN	NaN	NaN	NaN	0.331514	0.0694206	NaN	NaN	NaN	NaN	NaN	NaN	NaN	NaN	NaN	NaN	NaN	NaN	NaN	NaN	NaN	NaN	NaN	NaN	NaN	NaN	NaN	NaN	0.0823935	0.0323426
-17.15	0.0245614	0.0425416	0.02045	0.0234938	NaN	NaN	NaN	NaN	NaN	NaN	NaN	NaN	0.335531	0.0712956	NaN	NaN	NaN	NaN	NaN	NaN	NaN	NaN	NaN	NaN	NaN	NaN	NaN	NaN	NaN	NaN	NaN	NaN	NaN	NaN	NaN	NaN	0.0823935	0.0323426
-17.25	0.0280702	0.048619	0.0294435	0.0256416	NaN	NaN	NaN	NaN	NaN	NaN	NaN	NaN	0.34688	0.0726213	NaN	NaN	NaN	NaN	NaN	NaN	NaN	NaN	NaN	NaN	NaN	NaN	NaN	NaN	NaN	NaN	NaN	NaN	NaN	NaN	NaN	NaN	0.0823935	0.0323426
-17.35	0.0280702	0.048619	0.0316756	0.0295667	NaN	NaN	NaN	NaN	NaN	NaN	NaN	NaN	0.350896	0.0751192	NaN	NaN	NaN	NaN	NaN	NaN	NaN	NaN	NaN	NaN	NaN	NaN	NaN	NaN	NaN	NaN	NaN	NaN	NaN	NaN	NaN	NaN	0.0823935	0.0323426
-17.45	0.0280702	0.048619	0.0316756	0.0295667	NaN	NaN	NaN	NaN	NaN	NaN	NaN	NaN	0.366261	0.079498	NaN	NaN	NaN	NaN	NaN	NaN	NaN	NaN	NaN	NaN	NaN	NaN	NaN	NaN	NaN	NaN	NaN	NaN	NaN	NaN	NaN	NaN	0.0883459	0.0239247
-17.55	0.0280702	0.048619	0.0338308	0.0293148	NaN	NaN	NaN	NaN	NaN	NaN	NaN	NaN	0.366261	0.079498	NaN	NaN	NaN	NaN	NaN	NaN	NaN	NaN	NaN	NaN	NaN	NaN	NaN	NaN	NaN	NaN	NaN	NaN	NaN	NaN	NaN	NaN	0.0942982	0.0155067
-17.65	0.0280702	0.048619	0.0338308	0.0293148	NaN	NaN	NaN	NaN	NaN	NaN	NaN	NaN	0.370277	0.0830117	NaN	NaN	NaN	NaN	NaN	NaN	NaN	NaN	NaN	NaN	NaN	NaN	NaN	NaN	NaN	NaN	NaN	NaN	NaN	NaN	NaN	NaN	0.0942982	0.0155067
-17.75	0.0280702	0.048619	0.0338308	0.0293148	NaN	NaN	NaN	NaN	NaN	NaN	NaN	NaN	0.381577	0.0856602	NaN	NaN	NaN	NaN	NaN	NaN	NaN	NaN	NaN	NaN	NaN	NaN	NaN	NaN	NaN	NaN	NaN	NaN	NaN	NaN	NaN	NaN	0.0942982	0.0155067
-17.85	0.0280702	0.048619	0.0338308	0.0293148	NaN	NaN	NaN	NaN	NaN	NaN	NaN	NaN	0.381577	0.0856602	NaN	NaN	NaN	NaN	NaN	NaN	NaN	NaN	NaN	NaN	NaN	NaN	NaN	NaN	NaN	NaN	NaN	NaN	NaN	NaN	NaN	NaN	0.0995614	0.02295
-17.95	0.0280702	0.048619	0.0359859	0.0296931	NaN	NaN	NaN	NaN	NaN	NaN	NaN	NaN	0.396991	0.0895859	NaN	NaN	NaN	NaN	NaN	NaN	NaN	NaN	NaN	NaN	NaN	NaN	NaN	NaN	NaN	NaN	NaN	NaN	NaN	NaN	NaN	NaN	0.0995614	0.02295
-18.05	0.0280702	0.048619	0.0381411	0.0306784	NaN	NaN	NaN	NaN	NaN	NaN	NaN	NaN	0.401056	0.0926705	NaN	NaN	NaN	NaN	NaN	NaN	NaN	NaN	NaN	NaN	NaN	NaN	NaN	NaN	NaN	NaN	NaN	NaN	NaN	NaN	NaN	NaN	0.0995614	0.02295
-18.15	0.0280702	0.048619	0.0381411	0.0306784	NaN	NaN	NaN	NaN	NaN	NaN	NaN	NaN	0.405121	0.0961724	NaN	NaN	NaN	NaN	NaN	NaN	NaN	NaN	NaN	NaN	NaN	NaN	NaN	NaN	NaN	NaN	NaN	NaN	NaN	NaN	NaN	NaN	0.0995614	0.02295
-18.25	0.0280702	0.048619	0.0381411	0.0306784	NaN	NaN	NaN	NaN	NaN	NaN	NaN	NaN	0.409137	0.0996623	NaN	NaN	NaN	NaN	NaN	NaN	NaN	NaN	NaN	NaN	NaN	NaN	NaN	NaN	NaN	NaN	NaN	NaN	NaN	NaN	NaN	NaN	0.0995614	0.02295
-18.35	0.0280702	0.048619	0.0403733	0.0340476	NaN	NaN	NaN	NaN	NaN	NaN	NaN	NaN	0.421332	0.111196	NaN	NaN	NaN	NaN	NaN	NaN	NaN	NaN	NaN	NaN	NaN	NaN	NaN	NaN	NaN	NaN	NaN	NaN	NaN	NaN	NaN	NaN	0.0995614	0.02295
-18.45	0.0315789	0.0546963	0.0403733	0.0340476	NaN	NaN	NaN	NaN	NaN	NaN	NaN	NaN	0.435949	0.106925	NaN	NaN	NaN	NaN	NaN	NaN	NaN	NaN	NaN	NaN	NaN	NaN	NaN	NaN	NaN	NaN	NaN	NaN	NaN	NaN	NaN	NaN	0.0995614	0.02295
-18.55	0.0315789	0.0546963	0.0426054	0.0376453	NaN	NaN	NaN	NaN	NaN	NaN	NaN	NaN	0.448096	0.118302	NaN	NaN	NaN	NaN	NaN	NaN	NaN	NaN	NaN	NaN	NaN	NaN	NaN	NaN	NaN	NaN	NaN	NaN	NaN	NaN	NaN	NaN	0.0995614	0.02295
-18.65	0.0315789	0.0546963	0.0470697	0.0453057	NaN	NaN	NaN	NaN	NaN	NaN	NaN	NaN	0.469948	0.109869	NaN	NaN	NaN	NaN	NaN	NaN	NaN	NaN	NaN	NaN	NaN	NaN	NaN	NaN	NaN	NaN	NaN	NaN	NaN	NaN	NaN	NaN	0.0995614	0.02295
-18.75	0.0315789	0.0546963	0.0470697	0.0453057	NaN	NaN	NaN	NaN	NaN	NaN	NaN	NaN	0.469948	0.109869	NaN	NaN	NaN	NaN	NaN	NaN	NaN	NaN	NaN	NaN	NaN	NaN	NaN	NaN	NaN	NaN	NaN	NaN	NaN	NaN	NaN	NaN	0.0995614	0.02295
-18.85	0.0315789	0.0546963	0.0470697	0.0453057	NaN	NaN	NaN	NaN	NaN	NaN	NaN	NaN	0.481297	0.111208	NaN	NaN	NaN	NaN	NaN	NaN	NaN	NaN	NaN	NaN	NaN	NaN	NaN	NaN	NaN	NaN	NaN	NaN	NaN	NaN	NaN	NaN	0.0995614	0.02295
-18.95	0.0315789	0.0546963	0.0470697	0.0453057	NaN	NaN	NaN	NaN	NaN	NaN	NaN	NaN	0.488581	0.109011	NaN	NaN	NaN	NaN	NaN	NaN	NaN	NaN	NaN	NaN	NaN	NaN	NaN	NaN	NaN	NaN	NaN	NaN	NaN	NaN	NaN	NaN	0.0995614	0.02295
-19.05	0.0315789	0.0546963	0.051457	0.0496247	NaN	NaN	NaN	NaN	NaN	NaN	NaN	NaN	0.495914	0.10689	NaN	NaN	NaN	NaN	NaN	NaN	NaN	NaN	NaN	NaN	NaN	NaN	NaN	NaN	NaN	NaN	NaN	NaN	NaN	NaN	NaN	NaN	0.0995614	0.02295
-19.15	0.0354104	0.0516987	0.051457	0.0496247	NaN	NaN	NaN	NaN	NaN	NaN	NaN	NaN	0.503995	0.113888	NaN	NaN	NaN	NaN	NaN	NaN	NaN	NaN	NaN	NaN	NaN	NaN	NaN	NaN	NaN	NaN	NaN	NaN	NaN	NaN	NaN	NaN	0.0995614	0.02295
-19.25	0.0354104	0.0516987	0.0536122	0.0503217	NaN	NaN	NaN	NaN	NaN	NaN	NaN	NaN	0.522628	0.113019	NaN	NaN	NaN	NaN	NaN	NaN	NaN	NaN	NaN	NaN	NaN	NaN	NaN	NaN	NaN	NaN	NaN	NaN	NaN	NaN	NaN	NaN	0.0995614	0.02295
-19.35	0.0354104	0.0516987	0.0580765	0.0579271	NaN	NaN	NaN	NaN	NaN	NaN	NaN	NaN	0.525896	0.10736	NaN	NaN	NaN	NaN	NaN	NaN	NaN	NaN	NaN	NaN	NaN	NaN	NaN	NaN	NaN	NaN	NaN	NaN	NaN	NaN	NaN	NaN	0.0995614	0.02295
-19.45	0.0354104	0.0516987	0.0580765	0.0579271	NaN	NaN	NaN	NaN	NaN	NaN	NaN	NaN	0.529912	0.111136	NaN	NaN	NaN	NaN	NaN	NaN	NaN	NaN	NaN	NaN	NaN	NaN	NaN	NaN	NaN	NaN	NaN	NaN	NaN	NaN	NaN	NaN	0.0995614	0.02295
-19.55	0.0354104	0.0516987	0.0580765	0.0579271	NaN	NaN	NaN	NaN	NaN	NaN	NaN	NaN	0.536448	0.0998528	NaN	NaN	NaN	NaN	NaN	NaN	NaN	NaN	NaN	NaN	NaN	NaN	NaN	NaN	NaN	NaN	NaN	NaN	NaN	NaN	NaN	NaN	0.0995614	0.02295
-19.65	0.0354104	0.0516987	0.0603086	0.0618626	NaN	NaN	NaN	NaN	NaN	NaN	NaN	NaN	0.546252	0.0829465	NaN	NaN	NaN	NaN	NaN	NaN	NaN	NaN	NaN	NaN	NaN	NaN	NaN	NaN	NaN	NaN	NaN	NaN	NaN	NaN	NaN	NaN	0.0995614	0.02295
-19.75	0.0354104	0.0516987	0.0603086	0.0618626	NaN	NaN	NaN	NaN	NaN	NaN	NaN	NaN	0.553536	0.0816317	NaN	NaN	NaN	NaN	NaN	NaN	NaN	NaN	NaN	NaN	NaN	NaN	NaN	NaN	NaN	NaN	NaN	NaN	NaN	NaN	NaN	NaN	0.0995614	0.02295
-19.85	0.0354104	0.0516987	0.0603086	0.0618626	NaN	NaN	NaN	NaN	NaN	NaN	NaN	NaN	0.564885	0.082936	NaN	NaN	NaN	NaN	NaN	NaN	NaN	NaN	NaN	NaN	NaN	NaN	NaN	NaN	NaN	NaN	NaN	NaN	NaN	NaN	NaN	NaN	0.110088	0.0378364
-19.95	0.0354104	0.0516987	0.0603086	0.0618626	NaN	NaN	NaN	NaN	NaN	NaN	NaN	NaN	0.564885	0.082936	NaN	NaN	NaN	NaN	NaN	NaN	NaN	NaN	NaN	NaN	NaN	NaN	NaN	NaN	NaN	NaN	NaN	NaN	NaN	NaN	NaN	NaN	0.11604	0.0294185
-20.05	0.0354104	0.0516987	0.0624638	0.0624124	NaN	NaN	NaN	NaN	NaN	NaN	NaN	NaN	0.571421	0.0718162	NaN	NaN	NaN	NaN	NaN	NaN	NaN	NaN	NaN	NaN	NaN	NaN	NaN	NaN	NaN	NaN	NaN	NaN	NaN	NaN	NaN	NaN	0.121303	0.0368617
-20.15	0.0354104	0.0516987	0.0646959	0.0662856	NaN	NaN	NaN	NaN	NaN	NaN	NaN	NaN	0.581973	0.0657754	NaN	NaN	NaN	NaN	NaN	NaN	NaN	NaN	NaN	NaN	NaN	NaN	NaN	NaN	NaN	NaN	NaN	NaN	NaN	NaN	NaN	NaN	0.127256	0.0284438
-20.25	0.0354104	0.0516987	0.0690832	0.070795	NaN	NaN	NaN	NaN	NaN	NaN	NaN	NaN	0.586038	0.0675727	NaN	NaN	NaN	NaN	NaN	NaN	NaN	NaN	NaN	NaN	NaN	NaN	NaN	NaN	NaN	NaN	NaN	NaN	NaN	NaN	NaN	NaN	0.132519	0.035887
-20.35	0.0354104	0.0516987	0.0690832	0.070795	NaN	NaN	NaN	NaN	NaN	NaN	NaN	NaN	0.589306	0.0620541	NaN	NaN	NaN	NaN	NaN	NaN	NaN	NaN	NaN	NaN	NaN	NaN	NaN	NaN	NaN	NaN	NaN	NaN	NaN	NaN	NaN	NaN	0.143734	0.0349123
-20.45	0.0354104	0.0516987	0.0712384	0.0716165	NaN	NaN	NaN	NaN	NaN	NaN	NaN	NaN	0.589306	0.0620541	NaN	NaN	NaN	NaN	NaN	NaN	NaN	NaN	NaN	NaN	NaN	NaN	NaN	NaN	NaN	NaN	NaN	NaN	NaN	NaN	0.0497811	0.0316555	0.148997	0.0423555
-20.55	0.0387774	0.0484673	0.0803858	0.0813201	NaN	NaN	NaN	NaN	NaN	NaN	NaN	NaN	0.596639	0.0588094	NaN	NaN	NaN	NaN	NaN	NaN	NaN	NaN	NaN	NaN	NaN	NaN	NaN	NaN	NaN	NaN	NaN	NaN	NaN	NaN	0.0617851	0.0292589	0.148997	0.0423555
-20.65	0.0387774	0.0484673	0.0803858	0.0813201	NaN	NaN	NaN	NaN	NaN	NaN	NaN	NaN	0.596639	0.0588094	NaN	NaN	NaN	NaN	NaN	NaN	NaN	NaN	NaN	NaN	NaN	NaN	NaN	NaN	NaN	NaN	NaN	NaN	NaN	NaN	0.0669397	0.0365487	0.154261	0.0497987
-20.75	0.0387774	0.0484673	0.0828368	0.0797991	NaN	NaN	NaN	NaN	NaN	NaN	NaN	NaN	0.599907	0.0532118	NaN	NaN	NaN	NaN	NaN	NaN	NaN	NaN	NaN	NaN	NaN	NaN	NaN	NaN	NaN	NaN	NaN	NaN	NaN	NaN	0.0669397	0.0365487	0.160213	0.0413808
-20.85	0.0387774	0.0484673	0.0828368	0.0797991	NaN	NaN	NaN	NaN	NaN	NaN	NaN	NaN	0.603175	0.047629	NaN	NaN	NaN	NaN	NaN	NaN	NaN	NaN	NaN	NaN	NaN	NaN	NaN	NaN	NaN	NaN	NaN	NaN	NaN	NaN	0.0669397	0.0365487	0.166165	0.0329629
-20.95	0.0387774	0.0484673	0.0828368	0.0797991	NaN	NaN	NaN	NaN	NaN	NaN	NaN	NaN	0.611256	0.0545228	NaN	NaN	NaN	NaN	NaN	NaN	NaN	NaN	NaN	NaN	NaN	NaN	NaN	NaN	NaN	NaN	NaN	NaN	NaN	NaN	0.0720943	0.0438384	0.172118	0.0245449
-21.05	0.0387774	0.0484673	0.084992	0.0803455	NaN	NaN	NaN	NaN	NaN	NaN	NaN	NaN	0.615272	0.05912	NaN	NaN	NaN	NaN	NaN	NaN	NaN	NaN	NaN	NaN	NaN	NaN	NaN	NaN	NaN	NaN	NaN	NaN	NaN	NaN	0.0720943	0.0438384	0.172118	0.0245449
-21.15	0.0387774	0.0484673	0.0893793	0.084837	NaN	NaN	NaN	NaN	NaN	NaN	NaN	NaN	0.615272	0.05912	NaN	NaN	NaN	NaN	NaN	NaN	NaN	NaN	NaN	NaN	NaN	NaN	NaN	NaN	NaN	NaN	NaN	NaN	NaN	NaN	0.0789437	0.034152	0.172118	0.0245449
-21.25	0.0387774	0.0484673	0.0916114	0.0886253	NaN	NaN	NaN	NaN	NaN	NaN	NaN	NaN	0.615272	0.05912	NaN	NaN	NaN	NaN	NaN	NaN	NaN	NaN	NaN	NaN	NaN	NaN	NaN	NaN	NaN	NaN	NaN	NaN	NaN	NaN	0.0789437	0.034152	0.183333	0.0235702
-21.35	0.0387774	0.0484673	0.0938436	0.0924739	NaN	NaN	NaN	NaN	NaN	NaN	NaN	NaN	0.622605	0.0558352	NaN	NaN	NaN	NaN	NaN	NaN	NaN	NaN	NaN	NaN	NaN	NaN	NaN	NaN	NaN	NaN	NaN	NaN	NaN	NaN	0.0840983	0.0414418	0.188596	0.0310135
-21.45	0.0387774	0.0484673	0.0960757	0.0963757	NaN	NaN	NaN	NaN	NaN	NaN	NaN	NaN	0.625873	0.0502424	NaN	NaN	NaN	NaN	NaN	NaN	NaN	NaN	NaN	NaN	NaN	NaN	NaN	NaN	NaN	NaN	NaN	NaN	NaN	NaN	0.0840983	0.0414418	0.19386	0.0384567
-21.55	0.0387774	0.0484673	0.0960757	0.0963757	NaN	NaN	NaN	NaN	NaN	NaN	NaN	NaN	0.629938	0.0531365	NaN	NaN	NaN	NaN	NaN	NaN	NaN	NaN	NaN	NaN	NaN	NaN	NaN	NaN	NaN	NaN	NaN	NaN	NaN	NaN	0.0840983	0.0414418	0.19386	0.0384567
-21.65	0.0387774	0.0484673	0.0960757	0.0963757	NaN	NaN	NaN	NaN	NaN	NaN	NaN	NaN	0.637271	0.0511168	NaN	NaN	NaN	NaN	NaN	NaN	NaN	NaN	NaN	NaN	NaN	NaN	NaN	NaN	NaN	NaN	NaN	NaN	NaN	NaN	0.0840983	0.0414418	0.210338	0.0449252
-21.75	0.0387774	0.0484673	0.0982309	0.0969472	NaN	NaN	NaN	NaN	NaN	NaN	NaN	NaN	0.640539	0.0454764	NaN	NaN	NaN	NaN	NaN	NaN	NaN	NaN	NaN	NaN	NaN	NaN	NaN	NaN	NaN	NaN	NaN	NaN	NaN	NaN	0.0840983	0.0414418	0.221554	0.0439505
-21.85	0.0387774	0.0484673	0.0982309	0.0969472	NaN	NaN	NaN	NaN	NaN	NaN	NaN	NaN	0.644555	0.0488148	NaN	NaN	NaN	NaN	NaN	NaN	NaN	NaN	NaN	NaN	NaN	NaN	NaN	NaN	NaN	NaN	NaN	NaN	NaN	NaN	0.0840983	0.0414418	0.254511	0.0568875
-21.95	0.0387774	0.0484673	0.0982309	0.0969472	NaN	NaN	NaN	NaN	NaN	NaN	NaN	NaN	0.644555	0.0488148	NaN	NaN	NaN	NaN	NaN	NaN	NaN	NaN	NaN	NaN	NaN	NaN	NaN	NaN	NaN	NaN	NaN	NaN	NaN	NaN	0.0840983	0.0414418	0.292043	0.093129
-22.05	0.0387774	0.0484673	0.0982309	0.0969472	NaN	NaN	NaN	NaN	NaN	NaN	NaN	NaN	0.644555	0.0488148	NaN	NaN	NaN	NaN	NaN	NaN	NaN	NaN	NaN	NaN	NaN	NaN	NaN	NaN	NaN	NaN	NaN	NaN	NaN	NaN	0.0840983	0.0414418	0.341479	0.112535
-22.15	0.0387774	0.0484673	0.0982309	0.0969472	NaN	NaN	NaN	NaN	NaN	NaN	NaN	NaN	0.644555	0.0488148	NaN	NaN	NaN	NaN	NaN	NaN	NaN	NaN	NaN	NaN	NaN	NaN	NaN	NaN	NaN	NaN	NaN	NaN	NaN	NaN	0.0840983	0.0414418	0.380388	0.117054
-22.25	0.0387774	0.0484673	0.0982309	0.0969472	NaN	NaN	NaN	NaN	NaN	NaN	NaN	NaN	0.64862	0.0524565	NaN	NaN	NaN	NaN	NaN	NaN	NaN	NaN	NaN	NaN	NaN	NaN	NaN	NaN	NaN	NaN	NaN	NaN	NaN	NaN	0.0840983	0.0414418	0.429135	0.15232
-22.35	0.0421444	0.045754	0.100463	0.10081	NaN	NaN	NaN	NaN	NaN	NaN	NaN	NaN	0.655953	0.0511841	NaN	NaN	NaN	NaN	NaN	NaN	NaN	NaN	NaN	NaN	NaN	NaN	NaN	NaN	NaN	NaN	NaN	NaN	NaN	NaN	0.0840983	0.0414418	0.460714	0.19698
-22.45	0.0421444	0.045754	0.102618	0.101476	NaN	NaN	NaN	NaN	NaN	NaN	NaN	NaN	0.663286	0.0507095	NaN	NaN	NaN	NaN	NaN	NaN	NaN	NaN	NaN	NaN	NaN	NaN	NaN	NaN	NaN	NaN	NaN	NaN	NaN	NaN	0.0961022	0.0390452	0.521366	0.215411
-22.55	0.0421444	0.045754	0.102618	0.101476	NaN	NaN	NaN	NaN	NaN	NaN	NaN	NaN	0.666554	0.0453864	NaN	NaN	NaN	NaN	NaN	NaN	NaN	NaN	NaN	NaN	NaN	NaN	NaN	NaN	NaN	NaN	NaN	NaN	NaN	NaN	0.109801	0.0196724	0.599185	0.224449
-22.65	0.0421444	0.045754	0.102618	0.101476	NaN	NaN	NaN	NaN	NaN	NaN	NaN	NaN	0.674586	0.0494947	NaN	NaN	NaN	NaN	NaN	NaN	NaN	NaN	NaN	NaN	NaN	NaN	NaN	NaN	NaN	NaN	NaN	NaN	NaN	NaN	0.114956	0.0269621	0.654574	0.235436
-22.75	0.0459758	0.0422513	0.102618	0.101476	NaN	NaN	NaN	NaN	NaN	NaN	NaN	NaN	0.682717	0.0587054	NaN	NaN	NaN	NaN	NaN	NaN	NaN	NaN	NaN	NaN	NaN	NaN	NaN	NaN	NaN	NaN	NaN	NaN	NaN	NaN	0.114956	0.0269621	0.721867	0.229588
-22.85	0.0459758	0.0422513	0.10485	0.105301	NaN	NaN	NaN	NaN	NaN	NaN	NaN	NaN	0.690847	0.0695667	NaN	NaN	NaN	NaN	NaN	NaN	NaN	NaN	NaN	NaN	NaN	NaN	NaN	NaN	NaN	NaN	NaN	NaN	NaN	NaN	0.121805	0.0172757	0.771303	0.248994
-22.95	0.0459758	0.0422513	0.107082	0.109175	NaN	NaN	NaN	NaN	NaN	NaN	NaN	NaN	0.694115	0.0644509	NaN	NaN	NaN	NaN	NaN	NaN	NaN	NaN	NaN	NaN	NaN	NaN	NaN	NaN	NaN	NaN	NaN	NaN	NaN	NaN	0.126959	0.0245655	0.828759	0.212398
-23.05	0.0459758	0.0422513	0.109608	0.105941	NaN	NaN	NaN	NaN	NaN	NaN	NaN	NaN	0.697383	0.0594339	NaN	NaN	NaN	NaN	NaN	NaN	NaN	NaN	NaN	NaN	NaN	NaN	NaN	NaN	NaN	NaN	NaN	NaN	NaN	NaN	0.132114	0.0318553	0.876378	0.145054
-23.15	0.0459758	0.0422513	0.111763	0.106562	NaN	NaN	NaN	NaN	NaN	NaN	NaN	NaN	0.704667	0.0547812	NaN	NaN	NaN	NaN	NaN	NaN	NaN	NaN	NaN	NaN	NaN	NaN	NaN	NaN	NaN	NaN	NaN	NaN	NaN	NaN	0.132114	0.0318553	0.90614	0.102965
-23.25	0.0498072	0.0395599	0.113918	0.107352	NaN	NaN	NaN	NaN	NaN	NaN	NaN	NaN	0.720829	0.0678245	NaN	NaN	NaN	NaN	NaN	NaN	NaN	NaN	NaN	NaN	NaN	NaN	NaN	NaN	NaN	NaN	NaN	NaN	NaN	NaN	0.132114	0.0318553	0.946429	0.0757614
-23.35	0.0498072	0.0395599	0.113918	0.107352	NaN	NaN	NaN	NaN	NaN	NaN	NaN	NaN	0.724845	0.0694159	NaN	NaN	NaN	NaN	NaN	NaN	NaN	NaN	NaN	NaN	NaN	NaN	NaN	NaN	NaN	NaN	NaN	NaN	NaN	NaN	0.137269	0.039145	0.970238	0.0420897
-23.45	0.0498072	0.0395599	0.113918	0.107352	NaN	NaN	NaN	NaN	NaN	NaN	NaN	NaN	0.72891	0.0744762	NaN	NaN	NaN	NaN	NaN	NaN	NaN	NaN	NaN	NaN	NaN	NaN	NaN	NaN	NaN	NaN	NaN	NaN	NaN	NaN	0.149273	0.0367484	0.97619	0.0336718
-23.55	0.0498072	0.0395599	0.113918	0.107352	NaN	NaN	NaN	NaN	NaN	NaN	NaN	NaN	0.72891	0.0744762	NaN	NaN	NaN	NaN	NaN	NaN	NaN	NaN	NaN	NaN	NaN	NaN	NaN	NaN	NaN	NaN	NaN	NaN	NaN	NaN	0.154427	0.0440381	0.982143	0.0252538
-23.65	0.0498072	0.0395599	0.113918	0.107352	NaN	NaN	NaN	NaN	NaN	NaN	NaN	NaN	0.732178	0.0691107	NaN	NaN	NaN	NaN	NaN	NaN	NaN	NaN	NaN	NaN	NaN	NaN	NaN	NaN	NaN	NaN	NaN	NaN	NaN	NaN	0.154427	0.0440381	0.982143	0.0252538
-23.75	0.0498072	0.0395599	0.113918	0.107352	NaN	NaN	NaN	NaN	NaN	NaN	NaN	NaN	0.742779	0.0643071	NaN	NaN	NaN	NaN	NaN	NaN	NaN	NaN	NaN	NaN	NaN	NaN	NaN	NaN	NaN	NaN	NaN	NaN	NaN	NaN	0.154427	0.0440381	0.982143	0.0252538
-23.85	0.0498072	0.0395599	0.11615	0.11115	NaN	NaN	NaN	NaN	NaN	NaN	NaN	NaN	0.742779	0.0643071	NaN	NaN	NaN	NaN	NaN	NaN	NaN	NaN	NaN	NaN	NaN	NaN	NaN	NaN	NaN	NaN	NaN	NaN	NaN	NaN	0.161277	0.0343517	1	0
-23.95	0.0498072	0.0395599	0.118305	0.112016	NaN	NaN	NaN	NaN	NaN	NaN	NaN	NaN	0.746047	0.0593074	NaN	NaN	NaN	NaN	NaN	NaN	NaN	NaN	NaN	NaN	NaN	NaN	NaN	NaN	NaN	NaN	NaN	NaN	NaN	NaN	0.166431	0.0416415	NaN	NaN
-24.05	0.0498072	0.0395599	0.120538	0.115778	NaN	NaN	NaN	NaN	NaN	NaN	NaN	NaN	0.754079	0.0611031	NaN	NaN	NaN	NaN	NaN	NaN	NaN	NaN	NaN	NaN	NaN	NaN	NaN	NaN	NaN	NaN	NaN	NaN	NaN	NaN	0.171586	0.0489313	NaN	NaN
-24.15	0.0498072	0.0395599	0.120538	0.115778	NaN	NaN	NaN	NaN	NaN	NaN	NaN	NaN	0.758144	0.0663526	NaN	NaN	NaN	NaN	NaN	NaN	NaN	NaN	NaN	NaN	NaN	NaN	NaN	NaN	NaN	NaN	NaN	NaN	NaN	NaN	0.171586	0.0489313	NaN	NaN
-24.25	0.0498072	0.0395599	0.122693	0.116714	NaN	NaN	NaN	NaN	NaN	NaN	NaN	NaN	0.76216	0.0678746	NaN	NaN	NaN	NaN	NaN	NaN	NaN	NaN	NaN	NaN	NaN	NaN	NaN	NaN	NaN	NaN	NaN	NaN	NaN	NaN	0.18359	0.0465346	NaN	NaN
-24.35	0.0498072	0.0395599	0.122693	0.116714	NaN	NaN	NaN	NaN	NaN	NaN	NaN	NaN	0.766225	0.0729808	NaN	NaN	NaN	NaN	NaN	NaN	NaN	NaN	NaN	NaN	NaN	NaN	NaN	NaN	NaN	NaN	NaN	NaN	NaN	NaN	0.200748	0.0514278	NaN	NaN
-24.45	0.0498072	0.0395599	0.127299	0.115782	NaN	NaN	NaN	NaN	NaN	NaN	NaN	NaN	0.766225	0.0729808	NaN	NaN	NaN	NaN	NaN	NaN	NaN	NaN	NaN	NaN	NaN	NaN	NaN	NaN	NaN	NaN	NaN	NaN	NaN	NaN	0.217907	0.0563209	NaN	NaN
-24.55	0.0498072	0.0395599	0.129531	0.119424	NaN	NaN	NaN	NaN	NaN	NaN	NaN	NaN	0.774257	0.076988	NaN	NaN	NaN	NaN	NaN	NaN	NaN	NaN	NaN	NaN	NaN	NaN	NaN	NaN	NaN	NaN	NaN	NaN	NaN	NaN	0.224756	0.0466345	NaN	NaN
-24.65	0.0498072	0.0395599	0.131982	0.117575	NaN	NaN	NaN	NaN	NaN	NaN	NaN	NaN	0.778273	0.0798298	NaN	NaN	NaN	NaN	NaN	NaN	NaN	NaN	NaN	NaN	NaN	NaN	NaN	NaN	NaN	NaN	NaN	NaN	NaN	NaN	0.229911	0.0539243	NaN	NaN
-24.75	0.0498072	0.0395599	0.131982	0.117575	NaN	NaN	NaN	NaN	NaN	NaN	NaN	NaN	0.792093	0.0661784	NaN	NaN	NaN	NaN	NaN	NaN	NaN	NaN	NaN	NaN	NaN	NaN	NaN	NaN	NaN	NaN	NaN	NaN	NaN	NaN	0.24022	0.0685038	NaN	NaN
-24.85	0.0498072	0.0395599	0.134137	0.118637	NaN	NaN	NaN	NaN	NaN	NaN	NaN	NaN	0.792093	0.0661784	NaN	NaN	NaN	NaN	NaN	NaN	NaN	NaN	NaN	NaN	NaN	NaN	NaN	NaN	NaN	NaN	NaN	NaN	NaN	NaN	0.24707	0.0588174	NaN	NaN
-24.95	0.0536386	0.0378535	0.134137	0.118637	NaN	NaN	NaN	NaN	NaN	NaN	NaN	NaN	0.792093	0.0661784	NaN	NaN	NaN	NaN	NaN	NaN	NaN	NaN	NaN	NaN	NaN	NaN	NaN	NaN	NaN	NaN	NaN	NaN	NaN	NaN	0.24707	0.0588174	NaN	NaN
-25.05	0.0536386	0.0378535	0.136292	0.119845	NaN	NaN	NaN	NaN	NaN	NaN	NaN	NaN	0.798629	0.0548595	NaN	NaN	NaN	NaN	NaN	NaN	NaN	NaN	NaN	NaN	NaN	NaN	NaN	NaN	NaN	NaN	NaN	NaN	NaN	NaN	0.253919	0.049131	NaN	NaN
-25.15	0.0536386	0.0378535	0.136292	0.119845	NaN	NaN	NaN	NaN	NaN	NaN	NaN	NaN	0.798629	0.0548595	NaN	NaN	NaN	NaN	NaN	NaN	NaN	NaN	NaN	NaN	NaN	NaN	NaN	NaN	NaN	NaN	NaN	NaN	NaN	NaN	0.264228	0.0637105	NaN	NaN
-25.25	0.0536386	0.0378535	0.138524	0.123366	NaN	NaN	NaN	NaN	NaN	NaN	NaN	NaN	0.805913	0.0531376	NaN	NaN	NaN	NaN	NaN	NaN	NaN	NaN	NaN	NaN	NaN	NaN	NaN	NaN	NaN	NaN	NaN	NaN	NaN	NaN	0.264228	0.0637105	NaN	NaN
-25.35	0.0536386	0.0378535	0.140757	0.126946	NaN	NaN	NaN	NaN	NaN	NaN	NaN	NaN	0.809181	0.0475334	NaN	NaN	NaN	NaN	NaN	NaN	NaN	NaN	NaN	NaN	NaN	NaN	NaN	NaN	NaN	NaN	NaN	NaN	NaN	NaN	0.264228	0.0637105	NaN	NaN
-25.45	0.0536386	0.0378535	0.142912	0.12812	NaN	NaN	NaN	NaN	NaN	NaN	NaN	NaN	0.812449	0.0419441	NaN	NaN	NaN	NaN	NaN	NaN	NaN	NaN	NaN	NaN	NaN	NaN	NaN	NaN	NaN	NaN	0.0386525	0.039618	NaN	NaN	0.274537	0.07829	NaN	NaN
-25.55	0.0536386	0.0378535	0.145437	0.124683	NaN	NaN	NaN	NaN	NaN	NaN	NaN	NaN	0.820579	0.0486603	NaN	NaN	NaN	NaN	NaN	NaN	NaN	NaN	NaN	NaN	NaN	NaN	NaN	NaN	NaN	NaN	0.0469858	0.0514032	NaN	NaN	0.274537	0.07829	NaN	NaN
-25.65	0.0536386	0.0378535	0.145437	0.124683	NaN	NaN	NaN	NaN	NaN	NaN	NaN	NaN	0.820579	0.0486603	NaN	NaN	NaN	NaN	NaN	NaN	NaN	NaN	NaN	NaN	NaN	NaN	NaN	NaN	NaN	NaN	0.0469858	0.0514032	NaN	NaN	0.288236	0.0589172	NaN	NaN
-25.75	0.0536386	0.0378535	0.145437	0.124683	NaN	NaN	NaN	NaN	NaN	NaN	NaN	NaN	0.820579	0.0486603	NaN	NaN	NaN	NaN	NaN	NaN	NaN	NaN	NaN	NaN	NaN	NaN	NaN	NaN	NaN	NaN	0.0469858	0.0514032	NaN	NaN	0.30024	0.0565206	NaN	NaN
-25.85	0.0536386	0.0378535	0.147669	0.128273	NaN	NaN	NaN	NaN	NaN	NaN	NaN	NaN	0.820579	0.0486603	NaN	NaN	NaN	NaN	NaN	NaN	NaN	NaN	NaN	NaN	NaN	NaN	NaN	NaN	NaN	NaN	0.0469858	0.0514032	NaN	NaN	0.305395	0.0638104	NaN	NaN
-25.95	0.0536386	0.0378535	0.152057	0.133036	NaN	NaN	NaN	NaN	NaN	NaN	NaN	NaN	0.820579	0.0486603	NaN	NaN	NaN	NaN	NaN	NaN	NaN	NaN	NaN	NaN	NaN	NaN	NaN	NaN	NaN	NaN	0.052305	0.0438807	NaN	NaN	0.305395	0.0638104	NaN	NaN
-26.05	0.0536386	0.0378535	0.154289	0.136651	NaN	NaN	NaN	NaN	NaN	NaN	NaN	NaN	0.820579	0.0486603	NaN	NaN	NaN	NaN	NaN	NaN	NaN	NaN	NaN	NaN	NaN	NaN	NaN	NaN	NaN	NaN	0.052305	0.0438807	NaN	NaN	0.305395	0.0638104	NaN	NaN
-26.15	0.0536386	0.0378535	0.154289	0.136651	NaN	NaN	NaN	NaN	NaN	NaN	NaN	NaN	0.823847	0.0430359	NaN	NaN	NaN	NaN	NaN	NaN	NaN	NaN	NaN	NaN	NaN	NaN	NaN	NaN	NaN	NaN	0.052305	0.0438807	NaN	NaN	0.305395	0.0638104	NaN	NaN
-26.25	0.0536386	0.0378535	0.156521	0.140315	NaN	NaN	NaN	NaN	NaN	NaN	NaN	NaN	0.827115	0.0374222	NaN	NaN	NaN	NaN	NaN	NaN	NaN	NaN	NaN	NaN	NaN	NaN	NaN	NaN	NaN	NaN	0.052305	0.0438807	NaN	NaN	0.312244	0.054124	NaN	NaN
-26.35	0.0536386	0.0378535	0.156521	0.140315	NaN	NaN	NaN	NaN	NaN	NaN	NaN	NaN	0.830383	0.0318251	NaN	NaN	NaN	NaN	NaN	NaN	NaN	NaN	NaN	NaN	NaN	NaN	NaN	NaN	NaN	NaN	0.052305	0.0438807	NaN	NaN	0.336252	0.0493307	NaN	NaN
-26.45	0.0536386	0.0378535	0.156521	0.140315	NaN	NaN	NaN	NaN	NaN	NaN	NaN	NaN	0.837716	0.0313512	NaN	NaN	NaN	NaN	NaN	NaN	NaN	NaN	NaN	NaN	NaN	NaN	NaN	NaN	NaN	NaN	0.0576241	0.0363583	NaN	NaN	0.336252	0.0493307	NaN	NaN
-26.55	0.0536386	0.0378535	0.156521	0.140315	NaN	NaN	NaN	NaN	NaN	NaN	NaN	NaN	0.837716	0.0313512	NaN	NaN	NaN	NaN	NaN	NaN	NaN	NaN	NaN	NaN	NaN	NaN	NaN	NaN	NaN	NaN	0.0576241	0.0363583	NaN	NaN	0.353411	0.0542238	NaN	NaN
-26.65	0.0536386	0.0378535	0.156521	0.140315	NaN	NaN	NaN	NaN	NaN	NaN	NaN	NaN	0.841781	0.0370892	NaN	NaN	NaN	NaN	NaN	NaN	NaN	NaN	NaN	NaN	NaN	NaN	NaN	NaN	NaN	NaN	0.0576241	0.0363583	NaN	NaN	0.372264	0.0421408	NaN	NaN
-26.75	0.0536386	0.0378535	0.158753	0.144024	NaN	NaN	NaN	NaN	NaN	NaN	NaN	NaN	0.841781	0.0370892	NaN	NaN	NaN	NaN	NaN	NaN	NaN	NaN	NaN	NaN	NaN	NaN	NaN	NaN	NaN	NaN	0.0576241	0.0363583	NaN	NaN	0.382573	0.0567203	NaN	NaN
-26.85	0.0536386	0.0378535	0.161278	0.140838	NaN	NaN	NaN	NaN	NaN	NaN	NaN	NaN	0.845797	0.0379892	NaN	NaN	NaN	NaN	NaN	NaN	NaN	NaN	NaN	NaN	NaN	NaN	NaN	NaN	NaN	NaN	0.0576241	0.0363583	NaN	NaN	0.387728	0.0640101	NaN	NaN
-26.95	0.0536386	0.0378535	0.165959	0.138727	NaN	NaN	NaN	NaN	NaN	NaN	NaN	NaN	0.845797	0.0379892	NaN	NaN	NaN	NaN	NaN	NaN	NaN	NaN	NaN	NaN	NaN	NaN	NaN	NaN	NaN	NaN	0.0576241	0.0363583	NaN	NaN	0.398037	0.0785896	NaN	NaN
-27.05	0.0536386	0.0378535	0.165959	0.138727	NaN	NaN	NaN	NaN	NaN	NaN	NaN	NaN	0.845797	0.0379892	NaN	NaN	NaN	NaN	NaN	NaN	NaN	NaN	NaN	NaN	NaN	NaN	NaN	NaN	NaN	NaN	0.0576241	0.0363583	NaN	NaN	0.403192	0.0858794	NaN	NaN
-27.15	0.05747	0.0372674	0.170346	0.143483	NaN	NaN	NaN	NaN	NaN	NaN	NaN	NaN	0.845797	0.0379892	NaN	NaN	NaN	NaN	NaN	NaN	NaN	NaN	NaN	NaN	NaN	NaN	NaN	NaN	NaN	NaN	0.0576241	0.0363583	NaN	NaN	0.403192	0.0858794	NaN	NaN
-27.25	0.05747	0.0372674	0.170346	0.143483	NaN	NaN	NaN	NaN	NaN	NaN	NaN	NaN	0.845797	0.0379892	NaN	NaN	NaN	NaN	NaN	NaN	NaN	NaN	NaN	NaN	NaN	NaN	NaN	NaN	NaN	NaN	0.0576241	0.0363583	NaN	NaN	0.41689	0.0665066	NaN	NaN
-27.35	0.05747	0.0372674	0.170346	0.143483	NaN	NaN	NaN	NaN	NaN	NaN	NaN	NaN	0.845797	0.0379892	NaN	NaN	NaN	NaN	NaN	NaN	NaN	NaN	NaN	NaN	NaN	NaN	NaN	NaN	NaN	NaN	0.0576241	0.0363583	NaN	NaN	0.422045	0.0737963	NaN	NaN
-27.45	0.05747	0.0372674	0.172578	0.147194	NaN	NaN	NaN	NaN	NaN	NaN	NaN	NaN	0.845797	0.0379892	NaN	NaN	NaN	NaN	NaN	NaN	NaN	NaN	NaN	NaN	NaN	NaN	NaN	NaN	NaN	NaN	0.0576241	0.0363583	NaN	NaN	0.428894	0.0641099	NaN	NaN
-27.55	0.05747	0.0372674	0.177335	0.148004	NaN	NaN	NaN	NaN	NaN	NaN	NaN	NaN	0.845797	0.0379892	NaN	NaN	NaN	NaN	NaN	NaN	NaN	NaN	NaN	NaN	NaN	NaN	NaN	NaN	NaN	NaN	0.0576241	0.0363583	NaN	NaN	0.440898	0.0617133	NaN	NaN
-27.65	0.05747	0.0372674	0.179568	0.151817	NaN	NaN	NaN	NaN	NaN	NaN	NaN	NaN	0.853081	0.0344912	NaN	NaN	NaN	NaN	NaN	NaN	NaN	NaN	NaN	NaN	NaN	NaN	NaN	NaN	NaN	NaN	0.0576241	0.0363583	NaN	NaN	0.459751	0.0496303	NaN	NaN
-27.75	0.05747	0.0372674	0.181723	0.152719	NaN	NaN	NaN	NaN	NaN	NaN	NaN	NaN	0.857146	0.0392899	NaN	NaN	NaN	NaN	NaN	NaN	NaN	NaN	NaN	NaN	NaN	NaN	NaN	NaN	NaN	NaN	0.0576241	0.0363583	NaN	NaN	0.483759	0.044837	NaN	NaN
-27.85	0.05747	0.0372674	0.181723	0.152719	NaN	NaN	NaN	NaN	NaN	NaN	NaN	NaN	0.860414	0.0339122	NaN	NaN	NaN	NaN	NaN	NaN	NaN	NaN	NaN	NaN	NaN	NaN	NaN	NaN	NaN	NaN	0.0576241	0.0363583	NaN	NaN	0.507767	0.0400438	NaN	NaN
-27.95	0.05747	0.0372674	0.181723	0.152719	NaN	NaN	NaN	NaN	NaN	NaN	NaN	NaN	0.860414	0.0339122	NaN	NaN	NaN	NaN	NaN	NaN	NaN	NaN	NaN	NaN	NaN	NaN	NaN	NaN	NaN	NaN	0.0576241	0.0363583	NaN	NaN	0.526621	0.0279607	NaN	NaN
-28.05	0.05747	0.0372674	0.188635	0.154612	NaN	NaN	NaN	NaN	NaN	NaN	NaN	NaN	0.860414	0.0339122	NaN	NaN	NaN	NaN	NaN	NaN	NaN	NaN	NaN	NaN	NaN	NaN	NaN	NaN	NaN	NaN	0.0576241	0.0363583	NaN	NaN	0.538624	0.0255641	NaN	NaN
-28.15	0.060837	0.0323485	0.193242	0.153141	NaN	NaN	NaN	NaN	NaN	NaN	NaN	NaN	0.860414	0.0339122	NaN	NaN	NaN	NaN	NaN	NaN	NaN	NaN	NaN	NaN	NaN	NaN	NaN	NaN	NaN	NaN	0.0576241	0.0363583	NaN	NaN	0.584946	0.0329537	NaN	NaN
-28.25	0.060837	0.0323485	0.197925	0.154487	NaN	NaN	NaN	NaN	NaN	NaN	NaN	NaN	0.860414	0.0339122	NaN	NaN	NaN	NaN	NaN	NaN	NaN	NaN	NaN	NaN	NaN	NaN	NaN	NaN	NaN	NaN	0.0576241	0.0363583	NaN	NaN	0.614108	0.0354502	NaN	NaN
-28.35	0.0643458	0.03795	0.20045	0.151549	NaN	NaN	NaN	NaN	NaN	NaN	NaN	NaN	0.870966	0.0246902	NaN	NaN	NaN	NaN	NaN	NaN	NaN	NaN	NaN	NaN	NaN	NaN	NaN	NaN	NaN	NaN	0.0576241	0.0363583	NaN	NaN	0.644965	0.0209705	NaN	NaN
-28.45	0.0643458	0.03795	0.204914	0.159177	NaN	NaN	NaN	NaN	NaN	NaN	NaN	NaN	0.870966	0.0246902	NaN	NaN	NaN	NaN	NaN	NaN	NaN	NaN	NaN	NaN	NaN	NaN	NaN	NaN	NaN	NaN	0.0576241	0.0363583	NaN	NaN	0.680977	0.0137806	NaN	NaN
-28.55	0.0643458	0.03795	0.209597	0.160714	NaN	NaN	NaN	NaN	NaN	NaN	NaN	NaN	0.879048	0.0315708	NaN	NaN	NaN	NaN	NaN	NaN	NaN	NaN	NaN	NaN	NaN	NaN	NaN	NaN	NaN	NaN	0.0576241	0.0363583	NaN	NaN	0.699831	0.00169762	NaN	NaN
-28.65	0.071686	0.0428081	0.213908	0.162382	NaN	NaN	NaN	NaN	NaN	NaN	NaN	NaN	0.879048	0.0315708	NaN	NaN	NaN	NaN	NaN	NaN	NaN	NaN	NaN	NaN	NaN	NaN	NaN	NaN	NaN	NaN	0.0629433	0.0288359	NaN	NaN	0.732382	0.0297582	NaN	NaN
-28.75	0.071686	0.0428081	0.213908	0.162382	NaN	NaN	NaN	NaN	NaN	NaN	NaN	NaN	0.879048	0.0315708	NaN	NaN	NaN	NaN	NaN	NaN	NaN	NaN	NaN	NaN	NaN	NaN	NaN	NaN	NaN	NaN	0.0712766	0.040621	NaN	NaN	0.747846	0.00788892	NaN	NaN
-28.85	0.071686	0.0428081	0.220965	0.158891	NaN	NaN	NaN	NaN	NaN	NaN	NaN	NaN	0.879048	0.0315708	NaN	NaN	NaN	NaN	NaN	NaN	NaN	NaN	NaN	NaN	NaN	NaN	NaN	NaN	NaN	NaN	0.0712766	0.040621	NaN	NaN	0.7667	0.0199719	NaN	NaN
-28.95	0.071686	0.0428081	0.225722	0.159522	NaN	NaN	NaN	NaN	NaN	NaN	NaN	NaN	0.886332	0.0289229	NaN	NaN	NaN	NaN	NaN	NaN	NaN	NaN	NaN	NaN	NaN	NaN	NaN	NaN	NaN	NaN	0.0712766	0.040621	NaN	NaN	0.771854	0.0126822	NaN	NaN
-29.05	0.071686	0.0428081	0.230698	0.154267	NaN	NaN	NaN	NaN	NaN	NaN	NaN	NaN	0.890348	0.0330628	NaN	NaN	NaN	NaN	NaN	NaN	NaN	NaN	NaN	NaN	NaN	NaN	NaN	NaN	NaN	NaN	0.0796099	0.0524061	NaN	NaN	0.778704	0.0223686	NaN	NaN
-29.15	0.071686	0.0428081	0.235163	0.161968	NaN	NaN	NaN	NaN	NaN	NaN	NaN	NaN	0.890348	0.0330628	NaN	NaN	NaN	NaN	NaN	NaN	NaN	NaN	NaN	NaN	NaN	NaN	NaN	NaN	NaN	NaN	0.0796099	0.0524061	NaN	NaN	0.778704	0.0223686	NaN	NaN
-29.25	0.071686	0.0428081	0.237318	0.162745	NaN	NaN	NaN	NaN	NaN	NaN	NaN	NaN	0.894364	0.0380333	NaN	NaN	NaN	NaN	NaN	NaN	NaN	NaN	NaN	NaN	NaN	NaN	NaN	NaN	NaN	NaN	0.0796099	0.0524061	NaN	NaN	0.790708	0.0247652	NaN	NaN
-29.35	0.071686	0.0428081	0.237318	0.162745	NaN	NaN	NaN	NaN	NaN	NaN	NaN	NaN	0.894364	0.0380333	NaN	NaN	NaN	NaN	NaN	NaN	NaN	NaN	NaN	NaN	NaN	NaN	NaN	NaN	NaN	NaN	0.0796099	0.0524061	NaN	NaN	0.795862	0.0174755	NaN	NaN
-29.45	0.071686	0.0428081	0.241998	0.160626	NaN	NaN	NaN	NaN	NaN	NaN	NaN	NaN	0.89838	0.043551	NaN	NaN	NaN	NaN	NaN	NaN	NaN	NaN	NaN	NaN	NaN	NaN	NaN	NaN	NaN	NaN	0.0796099	0.0524061	NaN	NaN	0.795862	0.0174755	NaN	NaN
-29.55	0.071686	0.0428081	0.246679	0.158665	NaN	NaN	NaN	NaN	NaN	NaN	NaN	NaN	0.89838	0.043551	NaN	NaN	NaN	NaN	NaN	NaN	NaN	NaN	NaN	NaN	NaN	NaN	NaN	NaN	NaN	NaN	0.0796099	0.0524061	NaN	NaN	0.795862	0.0174755	NaN	NaN
-29.65	0.071686	0.0428081	0.246679	0.158665	NaN	NaN	NaN	NaN	NaN	NaN	NaN	NaN	0.89838	0.043551	NaN	NaN	NaN	NaN	NaN	NaN	NaN	NaN	NaN	NaN	NaN	NaN	NaN	NaN	NaN	NaN	0.0796099	0.0524061	NaN	NaN	0.801017	0.0101857	NaN	NaN
-29.75	0.071686	0.0428081	0.248911	0.16243	NaN	NaN	NaN	NaN	NaN	NaN	NaN	NaN	0.89838	0.043551	NaN	NaN	NaN	NaN	NaN	NaN	NaN	NaN	NaN	NaN	NaN	NaN	NaN	NaN	NaN	NaN	0.0796099	0.0524061	NaN	NaN	0.801017	0.0101857	NaN	NaN
-29.85	0.071686	0.0428081	0.251143	0.16623	NaN	NaN	NaN	NaN	NaN	NaN	NaN	NaN	0.901648	0.0385131	NaN	NaN	NaN	NaN	NaN	NaN	NaN	NaN	NaN	NaN	NaN	NaN	NaN	NaN	NaN	NaN	0.0796099	0.0524061	NaN	NaN	0.801017	0.0101857	NaN	NaN
-29.95	0.071686	0.0428081	0.255823	0.164346	NaN	NaN	NaN	NaN	NaN	NaN	NaN	NaN	0.901648	0.0385131	NaN	NaN	NaN	NaN	NaN	NaN	0.0416667	0.0385777	NaN	NaN	NaN	NaN	NaN	NaN	NaN	NaN	0.0849291	0.0448837	NaN	NaN	0.801017	0.0101857	NaN	NaN
-30.05	0.071686	0.0428081	0.265187	0.163764	NaN	NaN	NaN	NaN	NaN	NaN	NaN	NaN	0.901648	0.0385131	NaN	NaN	NaN	NaN	NaN	NaN	0.05	0.0571858	NaN	NaN	NaN	NaN	NaN	NaN	NaN	NaN	0.0849291	0.0448837	NaN	NaN	0.801017	0.0101857	NaN	NaN
-30.15	0.071686	0.0428081	0.272244	0.159819	NaN	NaN	NaN	NaN	NaN	NaN	NaN	NaN	0.901648	0.0385131	NaN	NaN	NaN	NaN	NaN	NaN	0.0583333	0.0485625	NaN	NaN	NaN	NaN	NaN	NaN	NaN	NaN	0.0849291	0.0448837	NaN	NaN	0.801017	0.0101857	NaN	NaN
-30.25	0.071686	0.0428081	0.274695	0.157518	NaN	NaN	NaN	NaN	NaN	NaN	NaN	NaN	0.901648	0.0385131	NaN	NaN	NaN	NaN	NaN	NaN	0.0583333	0.0485625	NaN	NaN	NaN	NaN	NaN	NaN	NaN	NaN	0.0849291	0.0448837	NaN	NaN	0.801017	0.0101857	NaN	NaN
-30.35	0.071686	0.0428081	0.274695	0.157518	NaN	NaN	NaN	NaN	NaN	NaN	NaN	NaN	0.905713	0.0392744	NaN	NaN	NaN	NaN	NaN	NaN	0.0583333	0.0485625	NaN	NaN	NaN	NaN	NaN	NaN	NaN	NaN	0.0849291	0.0448837	NaN	NaN	0.801017	0.0101857	NaN	NaN
-30.45	0.071686	0.0428081	0.274695	0.157518	NaN	NaN	NaN	NaN	NaN	NaN	NaN	NaN	0.909729	0.0447332	NaN	NaN	NaN	NaN	NaN	NaN	0.0583333	0.0485625	NaN	NaN	NaN	NaN	NaN	NaN	NaN	NaN	0.0849291	0.0448837	NaN	NaN	0.801017	0.0101857	NaN	NaN
-30.55	0.071686	0.0428081	0.274695	0.157518	NaN	NaN	NaN	NaN	NaN	NaN	NaN	NaN	0.913794	0.0459397	NaN	NaN	NaN	NaN	NaN	NaN	0.0583333	0.0485625	NaN	NaN	NaN	NaN	NaN	NaN	NaN	NaN	0.0849291	0.0448837	NaN	NaN	0.801017	0.0101857	NaN	NaN
-30.65	0.071686	0.0428081	0.274695	0.157518	NaN	NaN	NaN	NaN	NaN	NaN	NaN	NaN	0.913794	0.0459397	NaN	NaN	NaN	NaN	NaN	NaN	0.0583333	0.0485625	NaN	NaN	0.0416219	0.01557	NaN	NaN	NaN	NaN	0.101596	0.068454	NaN	NaN	0.801017	0.0101857	NaN	NaN
-30.75	0.071686	0.0428081	0.279082	0.162244	NaN	NaN	NaN	NaN	NaN	NaN	NaN	NaN	0.913794	0.0459397	NaN	NaN	NaN	NaN	NaN	NaN	0.0583333	0.0485625	NaN	NaN	0.0503938	0.0279754	NaN	NaN	NaN	NaN	0.101596	0.068454	NaN	NaN	0.801017	0.0101857	NaN	NaN
-30.85	0.075053	0.0380596	0.279082	0.162244	NaN	NaN	NaN	NaN	NaN	NaN	NaN	NaN	0.913794	0.0459397	NaN	NaN	NaN	NaN	NaN	NaN	0.0583333	0.0485625	NaN	NaN	0.0503938	0.0279754	NaN	NaN	NaN	NaN	0.101596	0.068454	NaN	NaN	0.801017	0.0101857	NaN	NaN
-30.95	0.075053	0.0380596	0.283763	0.160269	NaN	NaN	NaN	NaN	NaN	NaN	NaN	NaN	0.913794	0.0459397	NaN	NaN	NaN	NaN	NaN	NaN	0.0583333	0.0485625	NaN	NaN	0.0503938	0.0279754	NaN	NaN	NaN	NaN	0.109929	0.0802391	NaN	NaN	0.801017	0.0101857	NaN	NaN
-31.05	0.075053	0.0380596	0.29082	0.156821	NaN	NaN	NaN	NaN	NaN	NaN	NaN	NaN	0.913794	0.0459397	NaN	NaN	NaN	NaN	NaN	NaN	0.0666667	0.0399393	NaN	NaN	0.0503938	0.0279754	0.0456349	0.0140299	NaN	NaN	0.109929	0.0802391	NaN	NaN	0.806171	0.00289593	NaN	NaN
-31.15	0.07842	0.0336534	0.298028	0.155131	NaN	NaN	NaN	NaN	NaN	NaN	NaN	NaN	0.913794	0.0459397	NaN	NaN	NaN	NaN	NaN	NaN	0.0666667	0.0399393	NaN	NaN	0.0503938	0.0279754	0.0515873	0.00561196	NaN	NaN	0.115248	0.0727167	NaN	NaN	0.806171	0.00289593	NaN	NaN
-31.25	0.07842	0.0336534	0.302493	0.162615	NaN	NaN	NaN	NaN	NaN	NaN	NaN	NaN	0.913794	0.0459397	NaN	NaN	NaN	NaN	NaN	NaN	0.075	0.031316	NaN	NaN	0.0503938	0.0279754	0.0575397	0.00280598	NaN	NaN	0.120567	0.0651942	NaN	NaN	0.813021	0.0125823	NaN	NaN
-31.35	0.07842	0.0336534	0.316246	0.170797	NaN	NaN	NaN	NaN	NaN	NaN	NaN	NaN	0.917062	0.0405218	NaN	NaN	NaN	NaN	NaN	NaN	0.075	0.031316	NaN	NaN	0.0503938	0.0279754	0.0634921	0.0112239	NaN	NaN	0.120567	0.0651942	NaN	NaN	0.818175	0.00529257	NaN	NaN
-31.45	0.07842	0.0336534	0.320927	0.16839	NaN	NaN	NaN	NaN	NaN	NaN	NaN	NaN	0.917062	0.0405218	NaN	NaN	NaN	NaN	NaN	NaN	0.0833333	0.0226928	NaN	NaN	0.0503938	0.0279754	0.0634921	0.0112239	NaN	NaN	0.120567	0.0651942	NaN	NaN	0.818175	0.00529257	NaN	NaN
-31.55	0.07842	0.0336534	0.320927	0.16839	NaN	NaN	NaN	NaN	NaN	NaN	NaN	NaN	0.917062	0.0405218	NaN	NaN	NaN	NaN	NaN	NaN	0.0916667	0.0140695	NaN	NaN	0.0591658	0.0403808	0.0634921	0.0112239	NaN	NaN	0.120567	0.0651942	NaN	NaN	0.818175	0.00529257	NaN	NaN
-31.65	0.0822514	0.0326791	0.320927	0.16839	NaN	NaN	NaN	NaN	NaN	NaN	NaN	NaN	0.921078	0.0459241	NaN	NaN	NaN	NaN	NaN	NaN	0.133333	0.0290467	NaN	NaN	0.0591658	0.0403808	0.0694444	0.0196419	0.0469925	0.023208	0.120567	0.0651942	NaN	NaN	0.818175	0.00529257	NaN	NaN
-31.75	0.0822514	0.0326791	0.325684	0.169089	NaN	NaN	NaN	NaN	NaN	NaN	NaN	NaN	0.921078	0.0459241	NaN	NaN	NaN	NaN	NaN	NaN	0.133333	0.0290467	NaN	NaN	0.0591658	0.0403808	0.0694444	0.0196419	0.0505013	0.0203297	0.120567	0.0651942	NaN	NaN	0.818175	0.00529257	NaN	NaN
-31.85	0.0822514	0.0326791	0.332815	0.164673	NaN	NaN	NaN	NaN	NaN	NaN	NaN	NaN	0.921078	0.0459241	NaN	NaN	NaN	NaN	NaN	NaN	0.141667	0.03767	NaN	NaN	0.0591658	0.0403808	0.0694444	0.0196419	0.0505013	0.0203297	0.120567	0.0651942	NaN	NaN	0.818175	0.00529257	NaN	NaN
-31.95	0.0822514	0.0326791	0.335048	0.168517	NaN	NaN	NaN	NaN	NaN	NaN	NaN	NaN	0.921078	0.0459241	NaN	NaN	NaN	NaN	NaN	NaN	0.15	0.0462933	NaN	NaN	0.0591658	0.0403808	0.0833333	0	0.0505013	0.0203297	0.120567	0.0651942	NaN	NaN	0.818175	0.00529257	NaN	NaN
-32.05	0.0822514	0.0326791	0.335048	0.168517	NaN	NaN	NaN	NaN	NaN	NaN	NaN	NaN	0.921078	0.0459241	NaN	NaN	NaN	NaN	NaN	NaN	0.158333	0.0549165	NaN	NaN	0.0591658	0.0403808	0.0833333	0	0.0505013	0.0203297	0.142553	0.0812421	NaN	NaN	0.818175	0.00529257	NaN	NaN
-32.15	0.0822514	0.0326791	0.337499	0.166451	NaN	NaN	NaN	NaN	NaN	NaN	NaN	NaN	0.921078	0.0459241	NaN	NaN	NaN	NaN	NaN	NaN	0.166667	0.0635398	NaN	NaN	0.0591658	0.0403808	0.0833333	0	0.0505013	0.0203297	0.142553	0.0812421	NaN	NaN	0.818175	0.00529257	NaN	NaN
-32.25	0.0822514	0.0326791	0.352427	0.151176	NaN	NaN	NaN	NaN	NaN	NaN	NaN	NaN	0.925143	0.0472095	NaN	NaN	NaN	NaN	NaN	NaN	0.175	0.072163	NaN	NaN	0.0591658	0.0403808	0.0833333	0	0.0505013	0.0203297	0.142553	0.0812421	NaN	NaN	0.825025	0.014979	NaN	NaN
-32.35	0.0822514	0.0326791	0.354878	0.149348	NaN	NaN	NaN	NaN	NaN	NaN	NaN	NaN	0.928411	0.041775	NaN	NaN	NaN	NaN	NaN	NaN	0.183333	0.0807863	NaN	NaN	0.0591658	0.0403808	0.0833333	0	0.05401	0.0190225	0.147872	0.0737196	NaN	NaN	0.825025	0.014979	NaN	NaN
-32.45	0.0822514	0.0326791	0.359559	0.146675	NaN	NaN	NaN	NaN	NaN	NaN	NaN	NaN	0.931679	0.0364093	NaN	NaN	NaN	NaN	NaN	NaN	0.191667	0.0894095	NaN	NaN	0.0591658	0.0403808	0.0833333	0	0.0614871	0.0198381	0.147872	0.0737196	NaN	NaN	0.825025	0.014979	NaN	NaN
-32.55	0.0822514	0.0326791	0.359559	0.146675	NaN	NaN	NaN	NaN	NaN	NaN	NaN	NaN	0.934947	0.0311481	NaN	NaN	NaN	NaN	NaN	NaN	0.208333	0.106656	0.0477925	0.00927067	0.0591658	0.0403808	0.0833333	0	0.0614871	0.0198381	0.147872	0.0737196	NaN	NaN	0.825025	0.014979	NaN	NaN
-32.65	0.0822514	0.0326791	0.371299	0.146013	NaN	NaN	NaN	NaN	NaN	NaN	NaN	NaN	0.934947	0.0311481	NaN	NaN	NaN	NaN	NaN	NaN	0.208333	0.106656	0.0529471	0.00198091	0.0591658	0.0403808	0.0892857	0.00841794	0.0614871	0.0198381	0.147872	0.0737196	NaN	NaN	0.825025	0.014979	NaN	NaN
-32.75	0.0856184	0.027951	0.371299	0.146013	NaN	NaN	NaN	NaN	NaN	NaN	NaN	NaN	0.934947	0.0311481	NaN	NaN	NaN	NaN	NaN	NaN	0.208333	0.106656	0.0529471	0.00198091	0.0591658	0.0403808	0.0952381	0.0168359	0.0614871	0.0198381	0.147872	0.0737196	NaN	NaN	0.825025	0.014979	NaN	NaN
-32.85	0.0856184	0.027951	0.379997	0.151795	NaN	NaN	NaN	NaN	NaN	NaN	NaN	NaN	0.934947	0.0311481	NaN	NaN	NaN	NaN	NaN	NaN	0.208333	0.106656	0.0635365	0.0023771	0.0679377	0.0527862	0.0952381	0.0168359	0.0649958	0.0258781	0.147872	0.0737196	NaN	NaN	0.830179	0.0076892	NaN	NaN
-32.95	0.0856184	0.027951	0.386835	0.154754	NaN	NaN	NaN	NaN	NaN	NaN	NaN	NaN	0.943028	0.0376459	NaN	NaN	NaN	NaN	NaN	NaN	0.216667	0.115279	0.0635365	0.0023771	0.0679377	0.0527862	0.0952381	0.0168359	0.0685046	0.0319324	0.147872	0.0737196	NaN	NaN	0.830179	0.0076892	NaN	NaN
-33.05	0.0856184	0.027951	0.391441	0.154122	NaN	NaN	NaN	NaN	NaN	NaN	NaN	NaN	0.943028	0.0376459	NaN	NaN	NaN	NaN	NaN	NaN	0.233333	0.132526	0.074126	0.00277328	0.0679377	0.0527862	0.0952381	0.0168359	0.0685046	0.0319324	0.156206	0.0855048	NaN	NaN	0.830179	0.0076892	NaN	NaN
-33.15	0.0856184	0.027951	0.405115	0.155539	NaN	NaN	NaN	NaN	NaN	NaN	NaN	NaN	0.946296	0.0323517	NaN	NaN	NaN	NaN	NaN	NaN	0.241667	0.113918	0.08987	0.0041203	0.0679377	0.0527862	0.0952381	0.0168359	0.0759816	0.0346464	0.164539	0.0972899	NaN	NaN	0.830179	0.0076892	NaN	NaN
-33.25	0.0856184	0.027951	0.409798	0.157635	NaN	NaN	NaN	NaN	NaN	NaN	NaN	NaN	0.946296	0.0323517	NaN	NaN	NaN	NaN	NaN	NaN	0.258333	0.0767016	0.08987	0.0041203	0.0730397	0.0455708	0.0952381	0.0168359	0.0759816	0.0346464	0.164539	0.0972899	NaN	NaN	0.830179	0.0076892	NaN	NaN
-33.35	0.0856184	0.027951	0.411953	0.158706	NaN	NaN	NaN	NaN	NaN	NaN	NaN	NaN	0.946296	0.0323517	NaN	NaN	NaN	NaN	NaN	NaN	0.258333	0.0767016	0.08987	0.0041203	0.0781418	0.0383554	0.109127	0.00280598	0.0759816	0.0346464	0.169858	0.0897675	NaN	NaN	0.830179	0.0076892	NaN	NaN
-33.45	0.0891272	0.0337014	0.419085	0.154624	NaN	NaN	NaN	NaN	NaN	NaN	NaN	NaN	0.946296	0.0323517	NaN	NaN	NaN	NaN	NaN	NaN	0.266667	0.0580935	0.08987	0.0041203	0.0781418	0.0383554	0.121032	0.0140299	0.0759816	0.0346464	0.178191	0.101553	NaN	NaN	0.837029	0.0173756	NaN	NaN
-33.55	0.0891272	0.0337014	0.421317	0.158097	NaN	NaN	NaN	NaN	NaN	NaN	NaN	NaN	0.949564	0.0272053	NaN	NaN	NaN	NaN	NaN	NaN	0.266667	0.0580935	0.0953048	0.00356564	0.0869137	0.0507608	0.126984	0.0224478	0.0759816	0.0346464	0.183511	0.0940302	NaN	NaN	0.837029	0.0173756	NaN	NaN
-33.65	0.092636	0.0395497	0.435289	0.162415	NaN	NaN	NaN	NaN	NaN	NaN	NaN	NaN	0.956897	0.0229699	NaN	NaN	NaN	NaN	NaN	NaN	0.266667	0.0580935	0.100459	0.00372412	0.0869137	0.0507608	0.140873	0.00280598	0.0759816	0.0346464	0.183511	0.0940302	NaN	NaN	0.837029	0.0173756	NaN	NaN
-33.75	0.092636	0.0395497	0.444804	0.161744	NaN	NaN	NaN	NaN	NaN	NaN	NaN	NaN	0.960165	0.0175902	NaN	NaN	NaN	NaN	NaN	NaN	0.275	0.0667168	0.111329	0.0116478	0.0869137	0.0507608	0.146825	0.0112239	0.0759816	0.0346464	0.18883	0.0865077	NaN	NaN	0.837029	0.0173756	NaN	NaN
-33.85	0.092636	0.0395497	0.451938	0.163127	NaN	NaN	NaN	NaN	NaN	NaN	NaN	NaN	0.963433	0.0124616	NaN	NaN	NaN	NaN	NaN	NaN	0.275	0.0667168	0.111329	0.0116478	0.0869137	0.0507608	0.15873	0.0280598	0.0834586	0.0382868	0.194149	0.0789853	NaN	NaN	0.837029	0.0173756	NaN	NaN
-33.95	0.0961448	0.0454581	0.463161	0.16529	NaN	NaN	NaN	NaN	NaN	NaN	NaN	NaN	0.967498	0.0143054	NaN	NaN	NaN	NaN	NaN	NaN	0.275	0.0667168	0.116764	0.0193337	0.0869137	0.0507608	0.15873	0.0280598	0.0909357	0.032258	0.204787	0.0639405	NaN	NaN	0.837029	0.0173756	NaN	NaN
-34.05	0.0999762	0.043934	0.467548	0.169803	NaN	NaN	NaN	NaN	NaN	NaN	NaN	NaN	0.967498	0.0143054	NaN	NaN	NaN	NaN	NaN	NaN	0.275	0.0667168	0.132508	0.0124401	0.100788	0.0559508	0.164683	0.0364777	0.102381	0.026637	0.204787	0.0639405	NaN	NaN	0.843878	0.027062	NaN	NaN
-34.15	0.0999762	0.043934	0.478993	0.172998	NaN	NaN	NaN	NaN	NaN	NaN	NaN	NaN	0.978847	0.0156429	NaN	NaN	NaN	NaN	NaN	NaN	0.291667	0.0295006	0.137662	0.00515037	0.100788	0.0559508	0.164683	0.0364777	0.10589	0.0210806	0.204787	0.0639405	NaN	NaN	0.843878	0.027062	NaN	NaN
-34.25	0.103485	0.0496588	0.490881	0.168411	NaN	NaN	NaN	NaN	NaN	NaN	NaN	NaN	0.98618	0.0147857	NaN	NaN	NaN	NaN	NaN	NaN	0.308333	0.0467471	0.142817	0.00213939	0.10589	0.0487354	0.176587	0.0533136	0.10589	0.0210806	0.204787	0.0639405	NaN	NaN	0.843878	0.027062	NaN	NaN
-34.35	0.103485	0.0496588	0.498016	0.169828	NaN	NaN	NaN	NaN	NaN	NaN	NaN	NaN	0.989448	0.00988918	NaN	NaN	NaN	NaN	NaN	NaN	0.316667	0.0553704	0.142817	0.00213939	0.114662	0.0611408	0.18254	0.0617315	0.109858	0.0225067	0.210106	0.0564181	NaN	NaN	0.843878	0.027062	NaN	NaN
-34.45	0.103485	0.0496588	0.524466	0.161671	NaN	NaN	NaN	NaN	NaN	NaN	NaN	NaN	0.989448	0.00988918	NaN	NaN	NaN	NaN	NaN	NaN	0.325	0.0639936	0.153407	0.0017432	0.128536	0.0663308	0.18254	0.0617315	0.116876	0.0106931	0.215426	0.0488957	NaN	NaN	0.843878	0.027062	NaN	NaN
-34.55	0.106852	0.045463	0.534344	0.156508	NaN	NaN	NaN	NaN	NaN	NaN	NaN	NaN	0.993464	0.0113206	NaN	NaN	NaN	NaN	NaN	NaN	0.333333	0.0726169	0.163996	0.00134702	0.128536	0.0663308	0.18254	0.0617315	0.127861	0.0108614	0.234397	0.045636	NaN	NaN	0.850727	0.0367484	NaN	NaN
-34.65	0.110361	0.0513917	0.54118	0.153333	NaN	NaN	NaN	NaN	NaN	NaN	NaN	NaN	0.993464	0.0113206	NaN	NaN	NaN	NaN	NaN	NaN	0.341667	0.0812401	0.184895	0.0155304	0.133638	0.0591154	0.196429	0.0420897	0.135338	0.0170794	0.239716	0.0381136	NaN	NaN	0.850727	0.0367484	NaN	NaN
-34.75	0.117378	0.0633338	0.55983	0.149673	NaN	NaN	NaN	NaN	NaN	NaN	NaN	NaN	0.993464	0.0113206	NaN	NaN	NaN	NaN	NaN	NaN	0.358333	0.0984866	0.206074	0.014738	0.148944	0.0374693	0.202381	0.0505076	0.139307	0.0206992	0.24805	0.0498987	NaN	NaN	0.855882	0.0294586	NaN	NaN
-34.85	0.124577	0.0573311	0.573799	0.149803	NaN	NaN	NaN	NaN	NaN	NaN	NaN	NaN	0.993464	0.0113206	NaN	NaN	NaN	NaN	NaN	NaN	0.358333	0.0984866	0.216943	0.000633892	0.17159	0.0550647	0.222222	0.0392837	0.147243	0.0313912	0.261702	0.0541614	NaN	NaN	0.855882	0.0294586	NaN	NaN
-34.95	0.131452	0.0596941	0.585472	0.154955	NaN	NaN	NaN	NaN	NaN	NaN	NaN	NaN	0.996732	0.0056603	NaN	NaN	NaN	NaN	NaN	NaN	0.358333	0.0984866	0.238122	0.00142626	0.17159	0.0550647	0.248016	0.0364777	0.15472	0.0374444	0.289007	0.0626868	NaN	NaN	0.855882	0.0294586	NaN	NaN
-35.05	0.138793	0.0632747	0.589859	0.15897	NaN	NaN	NaN	NaN	NaN	NaN	NaN	NaN	1	0	NaN	NaN	NaN	NaN	NaN	NaN	0.375	0.0885018	0.253866	0.00546732	0.181794	0.040634	0.287698	0.0140299	0.18066	0.0446988	0.310993	0.0787346	NaN	NaN	0.855882	0.0294586	NaN	NaN
-35.15	0.152402	0.0595354	0.594836	0.154411	NaN	NaN	NaN	NaN	NaN	NaN	NaN	NaN	NaN	NaN	NaN	NaN	NaN	NaN	NaN	NaN	0.4	0.0599089	0.259021	0.0127571	0.186896	0.0334186	0.287698	0.0140299	0.192105	0.0525657	0.310993	0.0787346	NaN	NaN	0.855882	0.0294586	NaN	NaN
-35.25	0.173352	0.0608477	0.608805	0.154458	NaN	NaN	NaN	NaN	NaN	NaN	NaN	NaN	NaN	NaN	NaN	NaN	NaN	NaN	NaN	NaN	0.416667	0.0499241	0.274765	0.0196507	0.1971	0.0189878	0.299603	0.0308658	0.200042	0.0658071	0.310993	0.0787346	NaN	NaN	0.871346	0.00758934	NaN	NaN
-35.35	0.180551	0.0546073	0.613411	0.15523	NaN	NaN	NaN	NaN	NaN	NaN	NaN	NaN	NaN	NaN	NaN	NaN	NaN	NaN	NaN	NaN	0.425	0.031316	0.285074	0.0342302	0.202202	0.0117725	0.319444	0.0196419	0.218505	0.0716766	0.338298	0.08726	NaN	NaN	0.871346	0.00758934	NaN	NaN
-35.45	0.187891	0.0563973	0.618169	0.153914	NaN	NaN	NaN	NaN	NaN	NaN	NaN	NaN	NaN	NaN	NaN	NaN	NaN	NaN	NaN	NaN	0.441667	0.0485625	0.301378	0.0111724	0.216076	0.0169625	0.333333	0	0.248413	0.0896024	0.35195	0.0915227	NaN	NaN	0.871346	0.00758934	NaN	NaN
-35.55	0.195554	0.0497247	0.627902	0.148337	NaN	NaN	NaN	NaN	NaN	NaN	NaN	NaN	NaN	NaN	NaN	NaN	NaN	NaN	NaN	NaN	0.466667	0.0199696	0.323117	0.0195714	0.224848	0.0293678	0.333333	0	0.259858	0.0981545	0.376241	0.0807406	NaN	NaN	0.878195	0.0172757	NaN	NaN
-35.65	0.220013	0.0557412	0.639794	0.150862	NaN	NaN	NaN	NaN	NaN	NaN	NaN	NaN	NaN	NaN	NaN	NaN	NaN	NaN	NaN	NaN	0.491667	0.00862325	0.338581	0.00229786	0.242392	0.0541786	0.333333	0	0.266876	0.092314	0.38156	0.0732181	NaN	NaN	0.878195	0.0172757	NaN	NaN
-35.75	0.23072	0.0555391	0.641949	0.151216	NaN	NaN	NaN	NaN	NaN	NaN	NaN	NaN	NaN	NaN	NaN	NaN	NaN	NaN	NaN	NaN	0.516667	0.00998482	0.36004	0.0134702	0.2628	0.0253171	0.367063	0.0308658	0.282749	0.118925	0.386879	0.0656957	NaN	NaN	0.878195	0.0172757	NaN	NaN
-35.85	0.244936	0.0614167	0.65525	0.150271	NaN	NaN	NaN	NaN	NaN	NaN	NaN	NaN	NaN	NaN	NaN	NaN	NaN	NaN	NaN	NaN	0.541667	0.0113464	0.408113	0.0377166	0.2628	0.0253171	0.40873	0.0897913	0.301211	0.124673	0.41117	0.0549136	NaN	NaN	0.878195	0.0172757	NaN	NaN
-35.95	0.269717	0.058469	0.676943	0.145617	NaN	NaN	NaN	NaN	NaN	NaN	NaN	NaN	NaN	NaN	NaN	NaN	NaN	NaN	NaN	NaN	0.558333	0.0213312	0.445596	0.0615668	0.283208	0.00354439	0.428571	0.101015	0.335088	0.146268	0.432447	0.024824	NaN	NaN	0.885044	0.0269621	NaN	NaN
-36.05	0.291454	0.048431	0.701754	0.117405	NaN	NaN	NaN	NaN	NaN	NaN	NaN	NaN	NaN	NaN	NaN	NaN	NaN	NaN	NaN	NaN	0.625	0.0476548	0.477925	0.0927067	0.312388	0.0200005	0.47619	0.151523	0.350042	0.151953	0.489362	0.0150448	NaN	NaN	0.885044	0.0269621	NaN	NaN
-36.15	0.315771	0.0475767	0.711781	0.104506	NaN	NaN	NaN	NaN	NaN	NaN	NaN	NaN	NaN	NaN	NaN	NaN	NaN	NaN	NaN	NaN	0.675	0.072163	0.520002	0.0793158	0.340136	0.0096205	0.501984	0.154329	0.376441	0.169601	0.52961	0.0183045	NaN	NaN	0.890199	0.0196724	NaN	NaN
-36.25	0.326156	0.0579148	0.729984	0.103111	NaN	NaN	NaN	NaN	NaN	NaN	NaN	NaN	NaN	NaN	NaN	NaN	NaN	NaN	NaN	NaN	0.708333	0.0794247	0.604437	0.0675095	0.369316	0.0260766	0.615079	0.23009	0.427109	0.23845	0.578191	0.0398688	NaN	NaN	0.890199	0.0196724	NaN	NaN
-36.35	0.350937	0.0562146	0.739128	0.105235	NaN	NaN	NaN	NaN	NaN	NaN	NaN	NaN	NaN	NaN	NaN	NaN	NaN	NaN	NaN	NaN	0.758333	0.0767016	0.678563	0.0702828	0.405836	0.00329122	0.68254	0.291822	0.476859	0.288529	0.635106	0.0496479	NaN	NaN	0.890199	0.0196724	NaN	NaN
-36.45	0.390721	0.0453436	0.765801	0.0858078	NaN	NaN	NaN	NaN	NaN	NaN	NaN	NaN	NaN	NaN	NaN	NaN	NaN	NaN	NaN	NaN	0.825	0.0367623	0.779863	0.111486	0.44522	0.0341781	0.769841	0.246926	0.510735	0.310709	0.686702	0.0519046	NaN	NaN	0.890199	0.0196724	NaN	NaN
-36.55	0.422843	0.0445243	0.811713	0.0561114	NaN	NaN	NaN	NaN	NaN	NaN	NaN	NaN	NaN	NaN	NaN	NaN	NaN	NaN	NaN	NaN	0.891667	0.078517	0.816786	0.105385	0.548067	0.105193	0.837302	0.190807	0.570551	0.341349	0.759574	0.084251	NaN	NaN	0.895354	0.0123826	NaN	NaN
-36.65	0.465633	0.0707871	0.887553	0.0507412	NaN	NaN	NaN	NaN	NaN	NaN	NaN	NaN	NaN	NaN	NaN	NaN	NaN	NaN	NaN	NaN	0.941667	0.103025	0.901502	0.108554	0.649481	0.149371	0.910714	0.126269	0.603509	0.343734	0.838475	0.0779823	NaN	NaN	0.909052	0.0317554	NaN	NaN
-36.75	0.529592	0.052139	0.916378	0.0491316	NaN	NaN	NaN	NaN	NaN	NaN	NaN	NaN	NaN	NaN	NaN	NaN	NaN	NaN	NaN	NaN	0.958333	0.0930404	0.963918	0.0510283	0.720909	0.250386	0.964286	0.0505076	0.631579	0.319105	0.909752	0.0373613	NaN	NaN	0.914207	0.0244656	NaN	NaN
-36.85	0.579761	0.0540824	0.948327	0.0395344	NaN	NaN	NaN	NaN	NaN	NaN	NaN	NaN	NaN	NaN	NaN	NaN	NaN	NaN	NaN	NaN	0.983333	0.0372161	0.989691	0.0145795	0.807823	0.199625	0.994048	0.00841794	0.652632	0.300876	0.983333	0.0235702	NaN	NaN	0.926211	0.0268623	NaN	NaN
-36.95	0.648623	0.0497133	0.966095	0.026953	NaN	NaN	NaN	NaN	NaN	NaN	NaN	NaN	NaN	NaN	NaN	NaN	NaN	NaN	NaN	NaN	NaN	NaN	NaN	NaN	0.889635	0.141649	NaN	NaN	0.684211	0.274291	NaN	NaN	NaN	NaN	0.945064	0.0389453	NaN	NaN
-37.05	0.757952	0.0554206	0.977614	0.0276589	NaN	NaN	NaN	NaN	NaN	NaN	NaN	NaN	NaN	NaN	NaN	NaN	NaN	NaN	NaN	NaN	NaN	NaN	NaN	NaN	0.938596	0.0868377	NaN	NaN	0.736842	0.232772	NaN	NaN	NaN	NaN	0.945064	0.0389453	NaN	NaN
-37.15	0.869823	0.0447322	0.993085	0.00863541	NaN	NaN	NaN	NaN	NaN	NaN	NaN	NaN	NaN	NaN	NaN	NaN	NaN	NaN	NaN	NaN	NaN	NaN	NaN	NaN	0.947368	0.0744323	NaN	NaN	0.796491	0.181204	NaN	NaN	NaN	NaN	0.945064	0.0389453	NaN	NaN
-37.25	0.94342	0.00927096	0.993085	0.00863541	NaN	NaN	NaN	NaN	NaN	NaN	NaN	NaN	NaN	NaN	NaN	NaN	NaN	NaN	NaN	NaN	NaN	NaN	NaN	NaN	0.973684	0.0372161	NaN	NaN	0.85614	0.133287	NaN	NaN	NaN	NaN	0.945064	0.0389453	NaN	NaN
-37.35	0.996169	0.00663621	0.997549	0.00490196	NaN	NaN	NaN	NaN	NaN	NaN	NaN	NaN	NaN	NaN	NaN	NaN	NaN	NaN	NaN	NaN	NaN	NaN	NaN	NaN	NaN	NaN	NaN	NaN	0.901754	0.0907545	NaN	NaN	NaN	NaN	0.967377	0.0267624	NaN	NaN
-37.45	1	0	1	0	NaN	NaN	NaN	NaN	NaN	NaN	NaN	NaN	NaN	NaN	NaN	NaN	NaN	NaN	NaN	NaN	NaN	NaN	NaN	NaN	NaN	NaN	NaN	NaN	0.947368	0.0526316	NaN	NaN	NaN	NaN	NaN	NaN	NaN	NaN

## Sheet: NLO
Sample	Run	Droplet #	Freeze temperature
PbINP	2	1	-6.069
PbINP	2	2	-5.94
PbINP	2	3	-6.136
PbINP	2	4	-5.902
PbINP	2	5	-6.425
PbINP	2	6	-6.358
PbINP	2	7	-5.962
PbINP	2	8	-6.039
PbINP	2a	1	-6.059
PbINP	2a	2	-5.929
PbINP	2a	3	-6.385
PbINP	2a	4	-5.823
PbINP	2a	5	-6.189
PbINP	2a	6	-6.167
PbINP	2a	7	-6.212
PbINP	2a	8	-5.823
Y-extend only (Jan '23)	3	1	-9.063
Y-extend only (Jan '23)	3	2	-9.068
Y-extend only (Jan '23)	3	3	-9.203
Y-extend only (Jan '23)	3	4	-9.203
Y-extend only (Jan '23)	3	5	-9.316
Y-extend only (Jan '23)	3	6	-9.258
Y-extend only (Jan '23)	3	7	-9.063
Y-extend only (Jan '23)	3	8	-9.075
Y-extend only (Jan '23)	4	3	-9.131
Y-extend only (Jan '23)	5	1	-8.963
Y-extend only (Jan '23)	5	4	-8.802
Y-extend only (Jan '23)	5	6	-8.572
Y-extend only (Jan '23)	5	7	-9.027
Y-extend only (Jan '23)	5	8	-8.92
Y-extend only (Jan '23)	6	1	-9.071
Y-extend only (Jan '23)	6	2	-8.932
Y-extend only (Jan '23)	6	3	-9.136
Y-extend only (Jan '23)	6	4	-9.061
Cap 3x mutant	1	1	-24.195
Cap 3x mutant	1	2	-24.649
Cap 3x mutant	1	3	-21.466
Cap 3x mutant	2	1	-24.325
Cap 3x mutant	2	2	-23.987
Cap 3x mutant	2	3	-26.978
Cap 3x mutant	2	4	-23.739
Cap 3x mutant	2	5	-23.987
Cap 3x mutant	2	6	-21.731
Cap 3x mutant	3	1	-28.479
Cap 3x mutant	3	2	-28.036
Cap 3x mutant	3	3	-29.344
Cap 3x mutant	3	4	-22.004
Cap 3x mutant	3	5	-23.806
Cap 3x mutant	3	6	-28.901
R delete	4	1	DNF
R delete	4	2	DNF
R delete	4	3	DNF
R delete	4	4	DNF
R delete	4	5	DNF
R delete	4	6	DNF
R delete	4	7	DNF
R delete	4	8	DNF
R delete	5	1	DNF
R delete	5	2	DNF
R delete	5	3	DNF
R delete	5	4	DNF
R delete	5	5	DNF
R delete	5	6	DNF
R delete	5	7	DNF
R delete	5	8	DNF
PbINP	1	3	-8.608
PbINP	1	4	-7.567
PbINP	1	5	-6.908
PbINP	1	6	-7.242
PbINP	1	7	-8.565
AE	1		DNF
AE	1		DNF
AE	1		DNF
AE	1		DNF
AE	1		DNF
AE	1		DNF
AE	1		DNF
AE	2	1	DNF
AE	2	3	DNF
AE	2	5	DNF
AE	2	6	DNF
AE	2	7	DNF
AE	2	8	DNF
2x	1	2	-8.098
2x	1	4	-8.238
2x	1	5	-8.303
2x	1	6	-7.533
2x	1	7	-7.164
2x	2	1	-7.326
2x	2	2	-6.286
2x	2	3	-6.727
2x	2	4	-7.064
2x	2	5	-6.33
2x	2	6	-6.725
4x	1	3	-10.098
4x	1	5	-10.098
4x	2	1	-9.745
4x	2	2	-9.861
4x	2	3	-9.731
4x	2	4	-9.615
4x	2	5	-9.796
4x	2	6	-9.833
4x	2	7	-9.98
4x	2	8	-9.926
4x	3	1	-9.545
4x	3	2	-9.393
4x	3	3	-9.439
4x	3	4	-8.313
4x	3	5	-9.675
4x	3	6	-9.525
6x	2	2	DNF
6x	2	3	DNF
6x	2	5	-30.785
6x	2	7	DNF
6x	2	8	-27.835
6x	3	2	DNF
6x	3	3	DNF
6x	3	4	DNF
6x	3	5	-30.356
6x	3	6	-27.193
6x	3	7	DNF
8x	1	1	DNF
8x	1	2	DNF
8x	1	3	DNF
8x	1	4	DNF
8x	1	5	DNF
8x	1	6	DNF
8x	1	7	DNF
8x	1	8	DNF
8x	1	9	DNF
8x	1	10	DNF
8x	1	11	DNF
8x	1	12	DNF
8x	1	13	DNF
10x	1	1	DNF
10x	1	2	DNF
10x	1	3	DNF
10x	1	4	DNF
10x	1	5	DNF
10x	1	6	DNF
10x	1	7	DNF
10x	1	8	DNF
10x	1	9	DNF
10x	1	10	DNF
10x	1	11	DNF
R/K/H replace only	1	1	-14.394
R/K/H replace only	1	2	-14.653
R/K/H replace only	1	3	-15.894
R/K/H replace only	1	4	-14.003
R/K/H replace only	1	5	-17.838
R/K/H replace only	2	1	-15.886
R/K/H replace only	2	2	-16.268
R/K/H replace only	2	3	-14.392
R/K/H replace only	2	4	-13.807
R/K/H replace only	2	5	-16.554
R/K/H replace only	2	6	-16.813
R/K/H replace + Y-extend	1	1	-31.754
R/K/H replace + Y-extend	1	2	DNF
R/K/H replace + Y-extend	1	3	DNF
R/K/H replace + Y-extend	1	4	DNF
R/K/H replace + Y-extend	1	5	DNF
R/K/H replace + Y-extend	1	6	DNF
R/K/H replace + Y-extend	1	7	DNF
R/K/H replace + Y-extend	2	1	DNF
R/K/H replace + Y-extend	2	2	DNF
R/K/H replace + Y-extend	2	3	DNF
R/K/H replace + Y-extend	2	4	DNF
R/K/H replace + Y-extend	2	5	DNF
R/K/H replace + Y-extend	2	6	DNF
R/K/H replace + Y-extend	3	1	DNF
R/K/H replace + Y-extend	3	2	DNF
R/K/H replace + Y-extend	3	3	DNF
R/K/H replace + Y-extend	3	4	DNF
R/K/H replace + Y-extend	3	5	DNF
R/K/H replace + Y-extend	3	6	DNF
R/K/H replace + Y-extend	4	1	DNF
R/K/H replace + Y-extend	4	2	DNF
R/K/H replace + Y-extend	4	3	DNF
R/K/H replace + Y-extend	4	4	DNF
R/K/H replace + Y-extend	4	5	DNF
R/K/H replace + Y-extend	5	1	DNF
R/K/H replace + Y-extend	5	2	-20.252
R/K/H replace + Y-extend	5	3	DNF
R/K/H replace + Y-extend	5	4	DNF
Y-extend only	1	1	-8.869
Y-extend only	1	2	-8.758
Y-extend only	1	3	-8.822
Y-extend only	1	4	-8.758
Y-extend only	2	1	-9.012
Y-extend only	2	2	-9.248
Y-extend only	2	3	-9.336
Y-extend only	2	4	-9.575
Y-extend only	2	5	-9.469
Y-extend only	2	6	-9.534
Y-extend only	2	7	-9.391
K-coils	1	1	-5.165
K-coils	2	1	-6.658
K-coils	2	2	-6.43
K-coils	2	3	-6.998
K-coils	2	4	-7.643
K-coils	2	5	-7.608
N-truncation 1	1	1	-7.867
N-truncation 1	1	2	-8.119
N-truncation 1	1	3	-8.153
N-truncation 1	1	4	-8.153
N-truncation 1	1	5	-8.222
N-truncation 1	1	6	-8.161
N-truncation 1	1	7	-7.867
N-truncation 1	2	1	-8.894
N-truncation 1	2	2	-8.338
N-truncation 1	2	3	-8.894
N-truncation 1	2	4	-8.894
N-truncation 1	2	5	-9.023
N-truncation 1	2	6	-9.064
N-truncation 1	2	7	-8.548
N-truncation 2	1	1	-8.478
N-truncation 2	1	2	-8.343
N-truncation 2	1	3	-8.157
N-truncation 2	1	4	-8.616
N-truncation 2	1	5	-8.286
N-truncation 2	1	6	-8.157
N-truncation 2	2	1	-8.437
N-truncation 2	2	2	-8.729
N-truncation 2	2	3	-8.404
N-truncation 3	1	1	-8.999
N-truncation 3	1	2	-8.191
N-truncation 3	1	3	-8.091
N-truncation 3	1	4	-9.173
N-truncation 3	1	5	-9.195
N-truncation 3	1	6	-9.173
N-truncation 3	1	7	-8.286
R N-term. relocate	1	1	-24.447
R N-term. relocate	1	2	-18.548
R N-term. relocate	1	3	-24.447
R N-term. relocate	1	4	-24.771
R N-term. relocate	1	5	-23.352
R N-term. relocate	1	6	-16.986
R middle relocate	1	1	-23.876
R middle relocate	1	2	-26.92
R middle relocate	1	3	-28.61
R middle relocate	1	4	-26.919
R middle relocate	1	5	-28.405
R middle relocate	2	1	-25.43
R middle relocate	2	2	-27.825
R middle relocate	2	3	-24.918
R middle relocate	2	4	-25.502
R middle relocate	2	5	-24.972
R middle relocate	2	6	-28.016
R middle relocate	2	7	-29.05
R middle relocate	2	8	-26.993
R delete	1	1	-27.952
R delete	1	2	-9.389
R delete	1	3	-12.442
R delete	2	1	-27.319
R delete	2	2	-20.036
R delete	2	3	-28.674
R delete	2	4	-27.511
R delete	2	5	-18.113
R delete	2	6	-16.878
R delete	2	7	-17.449
R delete	2	8	-29.063
R delete	3	1	-19.456
R delete	3	2	-17.215
R delete	3	3	-24.587
R delete	3	4	-17.829
R delete	3	5	-26.539
R delete	3	6	-26.146
R delete	3	7	-22.638
R delete	3	8	-16.269
EagI	1	1	-8.833
EagI	1	2	-8.574
EagI	1	3	-8.532
EagI	1	4	-7.699
EagI	1	5	-7.883
EagI	1	6	-8.704
EagI	1	7	-8.251
EagI	1	8	-8.833
EagI	2	1	-8.895
EagI	2	2	-8.791
EagI	2	3	-8.867
EagI	2	4	-8.466
EagI	2	5	-8.606
PbINP FS	1	1	-9.317
PbINP FS	1	2	-9.592
PbINP FS	1	3	-9.592
PbINP FS	1	4	-9.73
PbINP FS	1	5	-9.574
PbINP FS	1	6	-9.658
PbINP FS	1	7	-9.317
PbINP FS	2	1	-9.412
PbINP FS	2	2	-9.672
PbINP FS	2	3	-9.658
PbINP FS	2	4	-9.7
PbINP FS	2	5	-9.352
PbINP 60 °C	1	1	-10.258
PbINP 60 °C	1	2	-9.934
PbINP 60 °C	1	3	-10.091
PbINP 60 °C	1	4	-9.843
PbINP 60 °C	1	5	-9.703
PbINP 60 °C	1	6	-9.963
PbINP 70 °C	1	1	-10.095
PbINP 70 °C	1	2	-10.257
PbINP 70 °C	1	3	-9.791
PbINP 70 °C	1	4	-10.305
PbINP 70 °C	1	5	-10.109
PbINP 70 °C	1	6	-10.369
PbINP 70 °C	1	7	-10.317
PbINP 70 °C	1	8	-10.45
PbINP 80 °C	1	1	-11.656
PbINP 80 °C	1	2	-11.017
PbINP 80 °C	1	3	-11.558
PbINP 80 °C	1	4	-10.907
PbINP 80 °C	1	5	-11.343
PbINP 90 °C	1	1	-12.759
PbINP 90 °C	1	2	-13.567
PbINP 90 °C	1	3	-12.329
PbINP 90 °C	1	4	-12.046
PbINP 90 °C	1	5	-13.89
PbINP 90 °C	1	6	-12.694
PbINP 90 °C	1	7	-12.577
PbINP 99 °C old	1	1	-13.872
PbINP 99 °C old	1	2	-14.587
PbINP 99 °C old	1	3	-14.602
PbINP 99 °C old	1	4	-13.565
PbINP 99 °C old	1	5	-17.453
PbINP 99 °C old	1	6	-14.847
PbINP 99 °C old	1	7	-17.503
EagI 60 °C	1	1	-11.604
EagI 60 °C	1	2	-11.599
EagI 60 °C	1	3	-11.274
EagI 60 °C	1	4	-11.334
EagI 60 °C	1	5	-11.079
EagI 60 °C	1	6	-11.473
EagI 70 °C	1	1	-11.671
EagI 70 °C	1	2	-11.459
EagI 70 °C	1	3	-11.621
EagI 70 °C	1	4	-11.653
EagI 70 °C	1	5	-11.805
EagI 70 °C	1	6	-11.405
EagI 70 °C	1	7	-12.057
EagI 70 °C	1	8	-11.604
EagI 80 °C	1	1	-12.768
EagI 80 °C	1	2	-14.194
EagI 80 °C	1	3	-12.895
EagI 80 °C	1	4	-13.226
EagI 80 °C	1	5	-12.5
EagI 90 °C Nov28	1	1	-19.478
EagI 90 °C Nov28	1	2	-17.265
EagI 90 °C Nov28	1	3	-17.265
EagI 90 °C Nov28	1	4	-13.485
EagI 90 °C Nov28	1	5	-14.346
EagI 90 °C Nov28	1	6	-16.608
EagI 99 °C Nov28	1	1	-19.719
EagI 99 °C Nov28	1	2	-18.358
EagI 99 °C Nov28	1	3	-13.399
EagI 99 °C Nov28	1	4	-15.306
EagI 99 °C Nov28	1	5	-18.418
KpnI	1	1	-12.317
KpnI	1	2	-12.184
KpnI	1	3	-12.177
KpnI	1	4	-12.24
KpnI	1	5	-11.983
KpnI	1	6	-12.305
KpnI	1	7	-12.252
KpnI	2	1	-12.629
KpnI	2	2	-12.77
KpnI	2	3	-12.694
KpnI	2	4	-12.77
KpnI	2	5	-12.629
KpnI	2	6	-12.85
KpnI	2	7	-12.694
KpnI	2	8	-12.76
mRuby21	1	1	-8.356
mRuby21	1	2	-8.533
mRuby21	1	3	-8.565
mRuby21	1	4	-8.553
mRuby21	1	5	-8.047
mRuby21	1	6	-8.21
mRuby21	1	7	-8.565
mRuby21	1	8	-8.553
mRuby21	2	1	-8.499
mRuby21	2	2	-8.545
mRuby21	2	3	-8.499
mRuby21	2	4	-8.572
mRuby21	2	5	-8.545
mRuby21	2	6	-8.479
8W1R	1	1	DNF
8W1R	1	2	DNF
8W1R	1	3	DNF
8W1R	1	4	DNF
8W1R	1	5	DNF
8W1R	1	6	DNF
8W1R	1	7	DNF
8W1R	1	8	DNF
pH 2.0	1	1	-19.004
pH 2.0	1	2	-17.639
pH 2.0	1	3	-17.183
pH 2.0	1	4	-15.042
pH 2.0	1	5	-14.592
pH 2.0	1	6	-17.379
pH 2.0	1	7	-18.614
pH 2.0	1	8	-18.682
pH 3.0	1	1	-13.527
pH 3.0	1	2	-12.18
pH 3.0	1	3	-13.287
pH 3.0	1	4	-12.051
pH 3.0	1	5	-13.132
pH 3.0	1	6	-13.677
pH 3.0	1	7	-13.527
pH 3.0	1	8	-12.705
pH 4.0	1	1	-14.325
pH 4.0	1	2	-15.107
pH 4.0	1	3	-15.173
pH 4.0	1	4	-13.937
pH 4.0	1	5	-14.259
pH 4.0	1	6	-13.216
pH 4.0	1	7	-12.38
pH 4.0	1	8	-13.216
pH 5.0	1	1	-10.657
pH 5.0	1	2	-10.361
pH 5.0	1	3	-10.301
pH 5.0	1	4	-10.306
pH 5.0	1	5	-10.046
pH 5.0	1	6	-10.534
pH 5.0	1	7	-10.295
pH 5.0	1	8	-10.436
pH 6.0	1	1	-10.174
pH 6.0	1	2	-10.238
pH 6.0	1	3	-10.171
pH 6.0	1	4	-9.97
pH 6.0	1	5	-10.36
pH 6.0	1	6	-10.163
pH 6.0	1	7	-10.23
pH 6.0	1	8	-10.1
pH 7.0	1	1	-9.835
pH 7.0	1	2	-9.976
pH 7.0	1	3	-10.04
pH 7.0	1	5	-10.105
pH 7.0	1	6	-10.105
pH 7.0	1	7	-10.235
pH 7.0	1	8	-9.91
pH 8.0	1	1	-9.54
pH 8.0	1	2	-9.38
pH 8.0	1	3	-9.588
pH 8.0	1	4	-9.54
pH 8.0	1	5	-9.918
pH 8.0	1	6	-9.605
pH 8.0	1	7	-9.669
pH 8.0	1	8	-9.984
pH 9.0	1	1	-9.867
pH 9.0	1	3	-9.51
pH 9.0	1	4	-9.655
pH 9.0	1	6	-9.803
pH 9.0	2	1	-9.789
pH 9.0	2	2	-9.789
pH 9.0	2	3	-9.717
pH 9.0	2	4	-9.859
pH 9.0	2	5	-9.614
pH 9.0	2	6	-9.631
pH 10.0	1	1	-10.3
pH 10.0	1	2	-10.62
pH 10.0	1	3	-10.55
pH 10.0	1	4	-10.365
pH 10.0	1	5	-10.429
pH 10.0	1	6	-10.419
pH 10.0	1	7	-10.233
pH 10.0	1	8	-10.233
pH 11.0	1	1	-10.806
pH 11.0	1	2	-10.822
pH 11.0	1	3	-11.198
pH 11.0	1	4	-10.946
pH 11.0	1	5	-10.905
pH 11.0	1	6	-10.881
pH 11.0	1	7	-10.686
